# Supplementary material
Source: PubMed Central journal article supplement (PMC2707798)
Supplement: NIHMS27305-supplement-supplementary_data.pdf [file NIHMS27305-supplement-supplementary_data.pdf]

## SUPPORTING ONLINE MATERIAL

### *MATERIALS AND METHODS*

#### **DNA pools experiment**

We measured DNA concentration in samples of T1D patients and controls using Picogreen reagent in three replicates and normalized it to 10 ng/μl. Then we made 10 pooled samples each comprising equal amounts of DNA from 48 T1D patients and 10 pooled samples each comprising equal amounts of DNA from 48 healthy controls. Thus, altogether we resequenced DNA of 480 T1D patients and 480 healthy controls from Great Britain.

We designed oligonucleotide primers to amplify 144 target regions that covered exons and regulatory sequences of the ten genes (Table S1 and T1Dbase: <http://www.t1dbase.org/page/PosterView/454Resequencing>). Oligonucleotide primers were synthesized to include region-specific primers at 3' ends (Table S1), with common overhangs at 5' ends to allow for direct introduction into the 454 Sequencing system (overhang 5'GCCTCCCTCGCGCCATCAG3' on all forward primers and overhang 5'GCCTTGCCAGCCCGCTCAG3' on all reverse primers). We amplified each pooled sample in 144 separate PCR reactions using PfuUltra™ High-Fidelity DNA Polymerase (Stratagene, La Jolla, CA, USA). We checked presence of a band of expected size on 2% agarose gel and then mixed together 144 PCR products amplified from the same pooled DNA sample, taking 5 μl of each product. Samples were purified on Qiaquick column and eluted in Qiagen Elution Buffer (<http://www1.qiagen.com/>). These purified samples

were further cleaned with SPRI beads (Agencourt AMPure kit; [http://www.agencourt.com/products/spri\\_reagents/ampure/](http://www.agencourt.com/products/spri_reagents/ampure/)) to remove low molecular weight DNA. Purified sample concentrations were measured by fluorescence using Picogreen reagent (<http://www.invitrogen.com/site/us/en/home/Products-and-Services/Applications/Nucleic-Acid-Purification-and-Analysis/>) and diluted to  $2 \times 10^5$  molecules/ $\mu$ l. Each sample was sequenced separately on a GS FLX instrument/ 100 cycle / 70x75 PTP 2Pad format, loading 750K beads per region.

For each of the 20 pooled DNA samples we obtained between 281,270 and 579,102 reads with average length of 250 bases, 9,416,365 reads in total:

| T1D samples | reads, (n) | Control samples | reads, (n) |
|-------------|------------|-----------------|------------|
| CS201b      | 575,009    | B58-1b          | 432,071    |
| CS202a      | 519,752    | B58-2a          | 560,756    |
| CS202b      | 281,270    | B58-2b          | 528,943    |
| CS203a      | 549,490    | B58-3a          | 490,731    |
| CS214a      | 552,040    | B58-3b          | 408,084    |
| CS214b      | 509,358    | B58-4b          | 402,734    |
| CS215a      | 456,437    | B58-5a          | 429,673    |
| CS215b      | 469,428    | B58-5b          | 383,972    |
| CS219a      | 437,871    | B58-6a          | 449,821    |
| CS219b      | 579,102    | B58-6b          | 399,823    |

We extracted reads in the fasta format from the .sff files using sffinfo command. The following sequence analyses were done using pregap4 and gap4 programs in the Staden package (<http://staden.sourceforge.net/>). We converted reads into .exp format using pregap4. Then we screened all reads against the sequence of 144 target regions using “Screen only” command in gap4 and recorded reads that matched to each target region. Then we assembled reads into 144 contigs using “Normal shotgun assembly” command in gap4 and ran “Shuffle pads” command on all contigs to improve alignment. After that we dumped contigs into text files and used a script to count number of reads carrying

nucleotides A, C, G, T, unknown nucleotides (N) or missing nucleotides (deletions) in each contig position, separately for reads generated from pooled DNA samples of T1D cases or controls. We calculated frequency of reads carrying nucleotides A, C, G, T or missing nucleotides. In each contig reads generated from each pooled DNA sample represented 96 chromosomes, which facilitated distinction of true polymorphisms from artifacts. In the pooled samples it was impossible to distinguish rare insertion/deletion polymorphisms from sequencing errors and here we have analyzed nucleotide substitutions only. We visually analyzed read alignments in the contigs in all putatively polymorphic positions to exclude misalignment.

We calculated allele frequencies separately for reads generated from 960 chromosomes of T1D patients and 960 chromosomes of controls and then estimated the number of chromosomes in the original pools that carry different allelic nucleotides.

To test how read output estimated allele frequency among samples in the DNA pool we analyzed eight SNPs from the sequenced regions that have been genotyped previously (rs1990760, rs3184504, rs2476601, rs1046355, rs3747517, rs5215, rs759011 and rs942200). We calculated correlation only if individual genotypes for at least 47 subjects that contributed to the DNA pool of 48 subjects were available (Fig. S1).

Statistically, resequencing 960 subjects provides 100% probability of detecting a variant at 1% frequency and 98% probability of detecting variants as low as 0.2% frequency. We have empirically assessed our false-negative detection rate for SNPs with confirmed allele frequencies and found that we detected all 37 SNPs that map in our resequenced regions and have known minor allele frequency  $\geq 1\%$  in subjects of the European descent, including eleven with 1% - 5% frequency (dbSNP build 128).

Association test based on 480 cases and 480 controls theoretically has 72% power to detect association at false-positive rate  $\alpha = 0.05$  for allele frequency 2% and OR = 2 or 45% power for allele frequency 1% and OR = 2 (Fig. S5). Given this statistical power, we cannot exclude that low frequency variants with smaller effects in the other nine genes, or that very rare variants in any of the ten genes, might also contribute to T1D. Since 480 cases and 480 controls do not provide statistical power to detect association of very rare variants with minor allele frequency  $\ll 1\%$  for effects with OR  $< 2$ , we have not determined the false-negative detection rate for such SNPs.

### **Genotyping experiment**

We studied a case-control collection consisting of 8,379 T1D patients and 10,575 controls from Great Britain. The recruitment of these subjects and sample processing have been described elsewhere (S1). We also studied a family collection including 3,165 type 1 diabetes families with one or two affected offspring (941 from Great Britain and Northern Ireland, 1,129 from Finland, 323 from the USA, 360 from Norway and 412 from Romania). The collection of all DNA samples has been approved by relevant ethical committees and written informed consent has been obtained from all participants.

Genotyping was done using TaqMan. We ordered pre-designed assays for the *IFIH1* SNPs rs35667974 and rs35337543 from Applied Biosystems (Warrington, UK). For other SNPs we ordered Assays-by-design. Genotypes were scored by two researchers independently to minimize error. Genotypes of controls and parents did not deviate from Hardy-Weinberg equilibrium above that expected at random ( $P > 0.05$ ).

Statistical analyses were performed within Stata statistical package (<http://www.stata.com>), using additional Stata routines (<http://www-gene.cimr.cam.ac.uk/clayton/software/>). All subjects in the case-control analysis were of the European descent, as we have excluded those of the non-European and unknown descent. Additionally, we performed statistical association tests stratifying for 12 geographical regions of Great Britain. We analyzed cases and controls using logistic regression models (S2). The families were analyzed using the transmission disequilibrium test (S3) and conditional logistic regression (S2). A score test was used to combine tests from family and case-control studies as described previously (S1). We report uncorrected *P*-values. Linkage disequilibrium plot of *D'* was generated using Haploview 4.1 (S4), while  $r^2$  values were calculated using pwld program in Stata. IFIH1 protein sequence alignment in 44 species was obtained from the UCSC genome browser (<http://genome.ucsc.edu/>).

## ***Acknowledgements***

We acknowledge use of DNA from the British 1958 Birth Cohort collection, funded by the Medical Research Council and the Wellcome Trust. We thank The Avon Longitudinal Study of Parents and Children laboratory in Bristol and the British 1958 Birth Cohort team (S. Ring, R. Jones, M. Pembrey, W. McArdle, D. Strachan and P. Burton) for preparing and providing the control DNA samples. We acknowledge use of DNA and thank the Human Biological Data Interchange for the USA families; Diabetes UK for the UK multiplex families; the Norwegian Study Group for Childhood Diabetes (D. Undlien and K. Ronningen) for the Norwegian families; D. Savage, C. Patterson, D. Carson and P. Maxwell for the Northern Irish families, Genetics of Type 1 Diabetes in Finland (GET1FIN) and J. Tuomilehto, L. Kinnunen, E. Tuomilehto-Wolf, V. Harjutsalo and T. Valle for the Finnish families and C. Guja and C. Ionescu-Tirgoviste for the Romanian families. We thank J. Simons formerly of 454 Life Sciences for suggestions in the early phase of the project and C. Celone for excellent technical assistance with the processing of samples and sequencing. We also thank JDRF/WT Diabetes and Inflammation Laboratory members B. Healy for making a poster page in T1DBase and H. Stevens, P. Clarke, G. Coleman, S. Duley, D. Harrison, S. Hawkins, M. Maisuria, T. Mistry and N. Taylor for preparing DNA samples.

Fig. S1. Correlation between allele frequencies in individually genotyped DNA samples and frequency estimates in the sequenced DNA pools

Individual genotypes for 8 SNPs and 20 pooled DNA samples were analyzed. We calculated correlation only if individual genotypes for at least 47 subjects that contributed to the DNA pool of 48 subjects were available, therefore, 54 data points are shown.

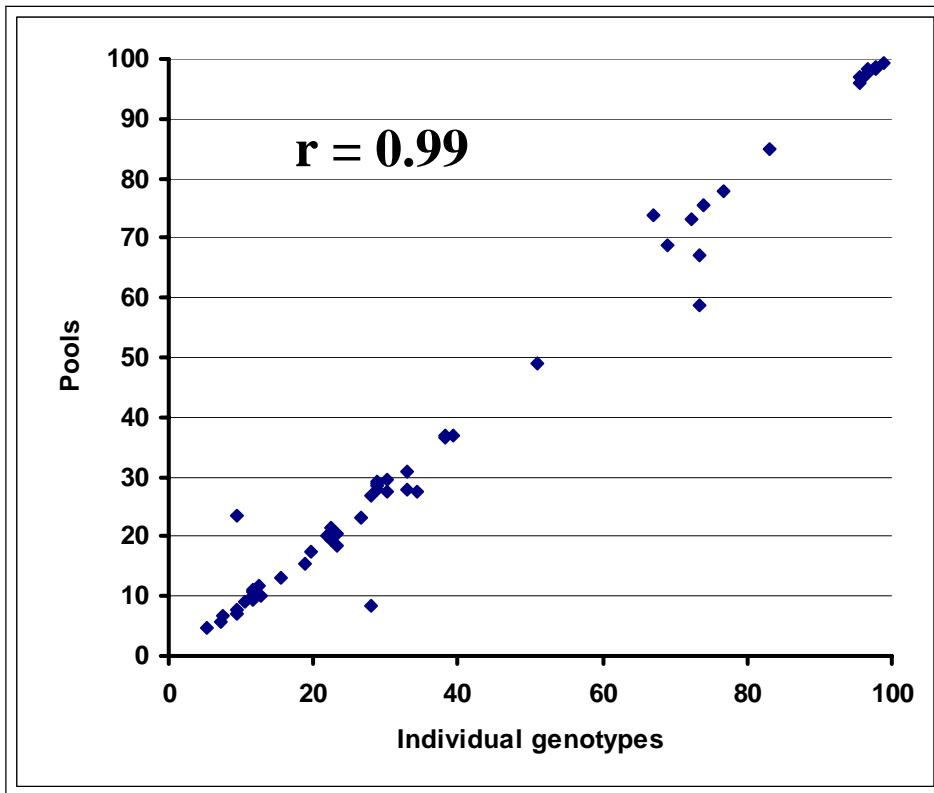

Fig. S2. IFIH1 amino acid alignment in vertebrates

Multiz Alignment of the IFIH1 protein sequence in 44 species showing conserved

Isoleucine at position 923 (UCSC genome browser, <http://genome.ucsc.edu/>). SNP

rs35667974/Ile923Val is shown.

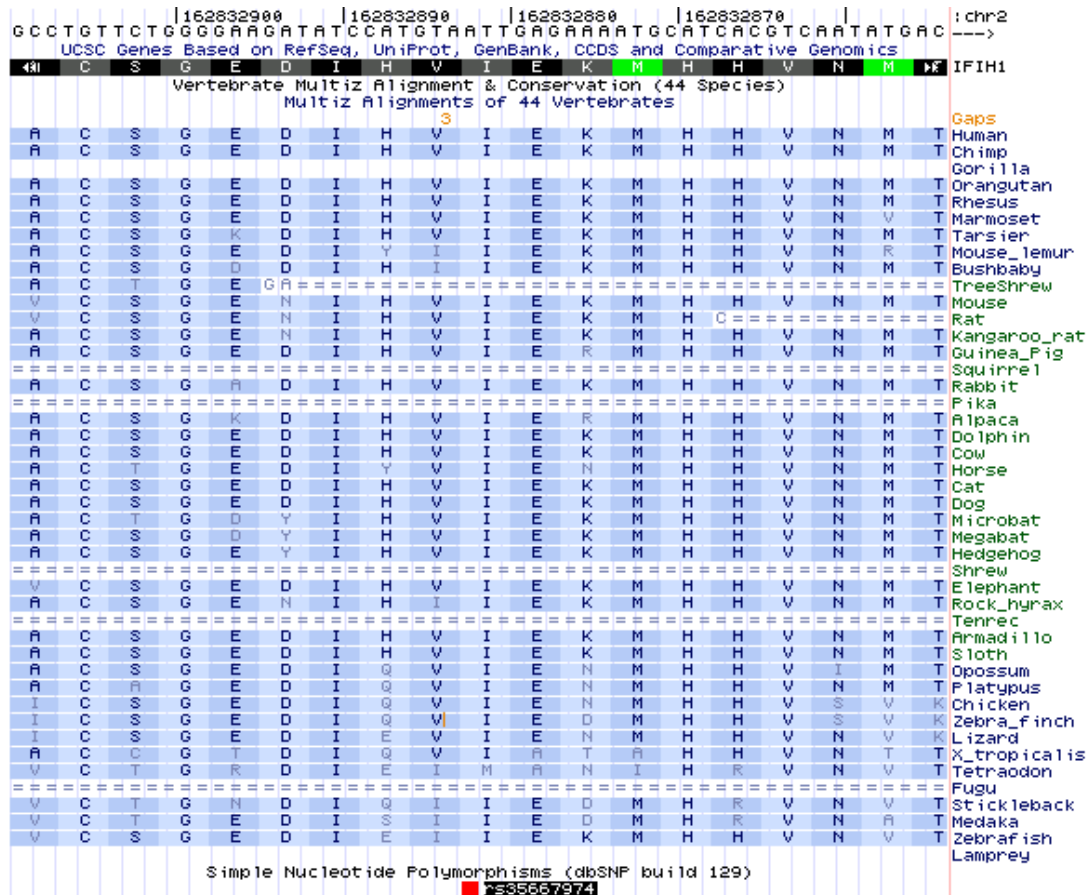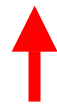



Fig. S3. Schematic presentation of the IFIH1 protein (green), its domains (yellow) and variants (white boxes)

Four rare variants (rs35667974/Ile923Val, rs35337543/IVS8+1, rs35744605/Glu627X, rs35732034/IVS14+1) and a common variant (rs1990760/Thr946Ala) associated with T1D independently of each other are shown above the protein. Other tested polymorphisms are shown below the protein. CARD - caspase recruitment domain.

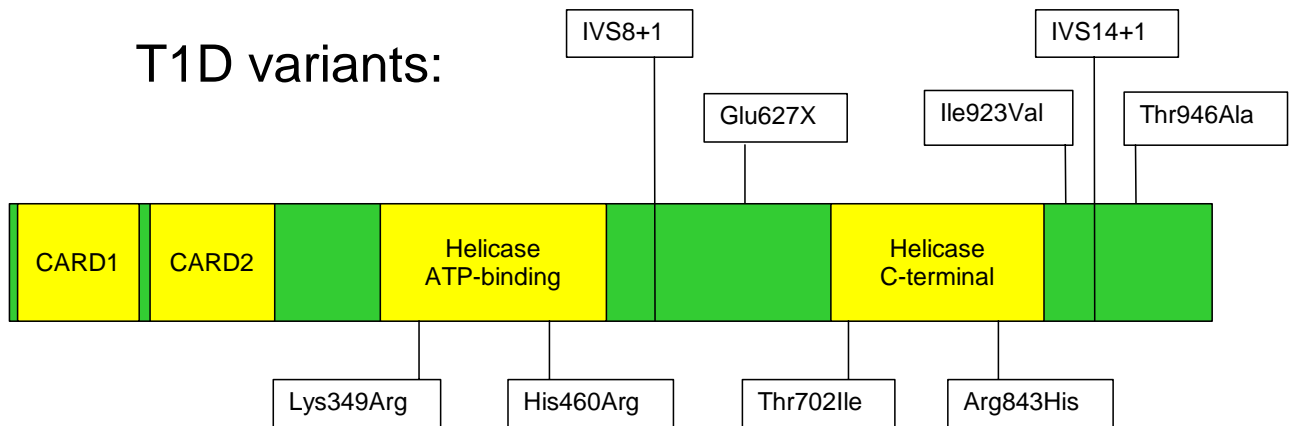

Fig. S4. Linkage disequilibrium in the IFIH1 gene region on chromosome 2, positions 162,690 kb – 163,110 kb

Genes *IFIH1*, *FAP*, *GCA* and part of *KCNH7* reside within one linkage disequilibrium block. Linkage disequilibrium plot shows  $D'$  calculated for CEU subjects (HapMap data release 23a/phase II on NCBI36 assembly, dbSNP build 126; <http://www.hapmap.org/>).

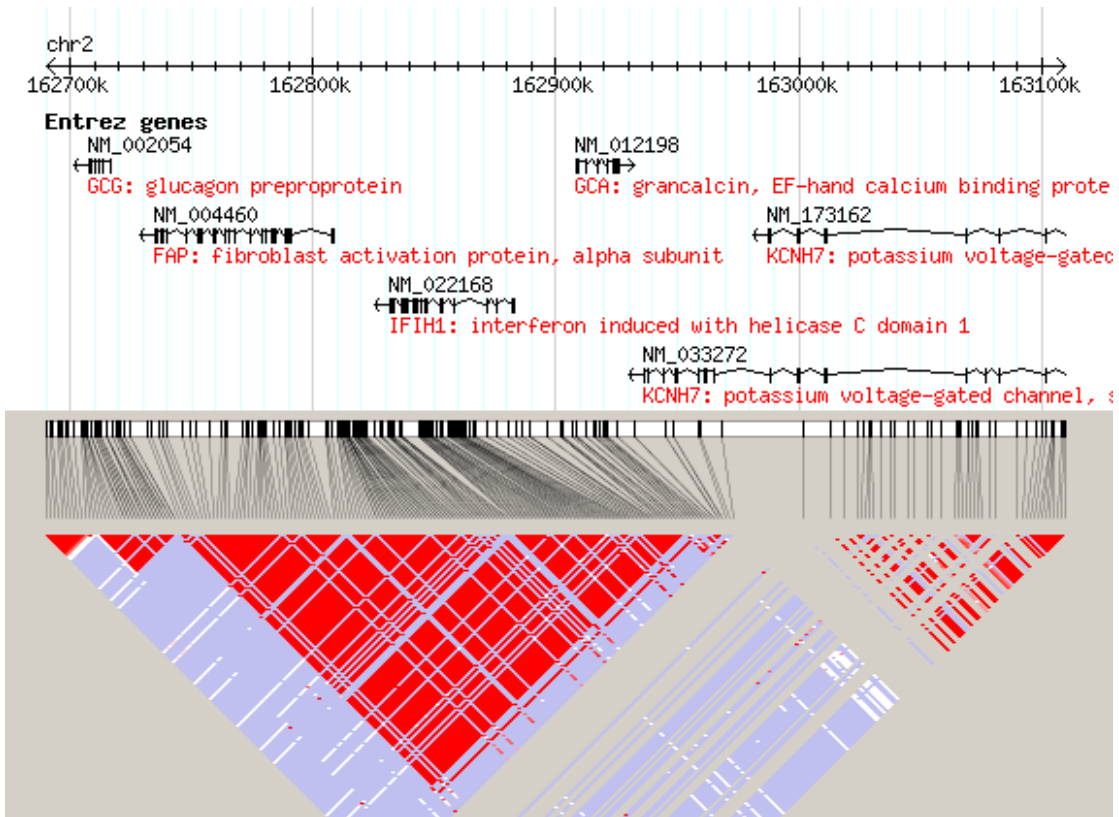

Fig. S5. Statistical power calculations for rare variants

Statistical power to detect association of rare variants at  $\alpha = 0.05$  assuming multiplicative model and equal number of cases and controls. Note that samples comprising at least 2,000 cases and 2,000 controls may be needed for >80% power to detect association of rare alleles if they have effects with  $OR < 2$ .

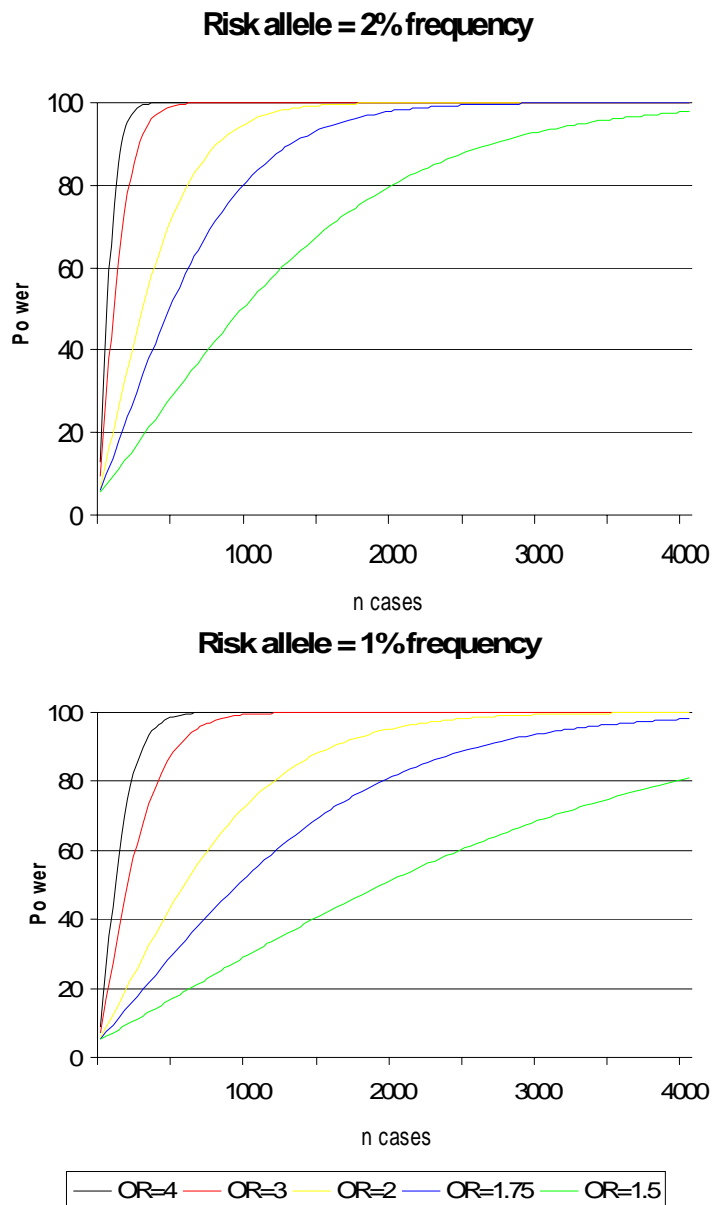

Table S1. Region-specific primers for amplification of 144 target regions in ten genes.

Oligonucleotides used in PCR reaction included region-specific primers with common 5' overhangs.

| Amplicon | Gene           | Forward primer              | Reverse primer            | PCR product, bp |
|----------|----------------|-----------------------------|---------------------------|-----------------|
| 1A01     | <i>CLEC16A</i> | GCATCCTCCGCTTGTGCTA         | CGCTCTCACGCCTCCTAGA       | 265             |
| 1A02     | <i>CLEC16A</i> | GCTAATGGTCATGGAACCTTGG      | CAAAGAACAGCAATCATTAGAAACC | 231             |
| 1A03     | <i>CLEC16A</i> | ACATGTGGAAGCAAGCCACT        | GCCCAACTTCACCCTGCTA       | 240             |
| 1A04     | <i>CLEC16A</i> | CCTCCAGCATGAGTTAACCTGT      | GTGCCCCCTCTGGCAATTACT     | 215             |
| 1A05     | <i>CLEC16A</i> | GCCTGGCTTATGGGCTTAT         | TCGTGACAATCGGAGAACTG      | 251             |
| 1A06     | <i>CLEC16A</i> | AAGTTATTTTTGGTAGCTTGACTTTTT | TCCCCTAACCACCCTGTCTA      | 225             |
| 1A07     | <i>CLEC16A</i> | GGCTGAGGTGGTCATTTCTC        | TTCTTCCCCACTTCTGATGG      | 257             |
| 1A08     | <i>CLEC16A</i> | GGAAGTCAGTGGGACAGGAC        | GTGATAAGGCCTGGGGATTT      | 259             |
| 1A09     | <i>CLEC16A</i> | CTGATCCAGGAAGCAAGAGG        | CACACAGATTAGCAAAAATGAGCA  | 250             |
| 1A10     | <i>CLEC16A</i> | GTTGCCTTCGTTGGACTTTC        | GCGTTCATGGGGACACTC        | 276             |
| 1A11     | <i>CLEC16A</i> | CATCCCAGTCTCCATTTTGG        | AGGGACAGAAGAGGCTCTGG      | 258             |
| 1A12     | <i>CLEC16A</i> | ACCCCATGTGCAGGTTAGAG        | CCTTTCCTTGTCCCTCCATGC     | 269             |
| 1B01     | <i>CLEC16A</i> | TTCGGTATGAGGAGGTCAGG        | GTGGGGTCTGCTTCCTACAA      | 245             |
| 1B02     | <i>CLEC16A</i> | TAGCCTCAACGTGGATAGGC        | CTTCCCTCCTGTCCCTCCTGT     | 260             |
| 1B03     | <i>CLEC16A</i> | GAATTCGTAGTTTGCCCGACT       | TTTATCTGCATAGAACCAGACACC  | 200             |
| 1B04     | <i>CLEC16A</i> | GATGGCCTCTAAAGCCACAA        | AAAAACTCCCTCTGGGATGG      | 234             |
| 1B05     | <i>CLEC16A</i> | CCCCTTCCTCCTTCCAAGT         | GTCTGGGAGTGGTTCTGGAG      | 248             |
| 1B06     | <i>CLEC16A</i> | TGTGGGGCATCTCACTGAA         | AGCAGAGTGGTGTCCCATGT      | 254             |
| 1B07     | <i>CLEC16A</i> | CAGCTTTGGTGTCTCCATCA        | CAGAGCTCCTGGCCATCTT       | 244             |
| 1B08     | <i>CLEC16A</i> | TGCCTTTTCCTTTGCTTCT         | CCACCAAGTGCTCAGAGG        | 279             |
| 1B09     | <i>CLEC16A</i> | TCCCACATGCTCAGAGTGAA        | ACCATGATGAACGAGCTGTG      | 254             |
| 1B10     | <i>CLEC16A</i> | AGGCCTACTCTTTGCTTCCA        | CCCCATATCACTGAGTCACG      | 243             |
| 1B11     | <i>CLEC16A</i> | CCCCTCGTCAGTGCTCAG          | GGAGACCTGCCTGAATTGAC      | 243             |
| 1B12     | <i>CLEC16A</i> | GGTGTCTCAAGGGCTCAGTG        | CGTGTCAGCCGTGTCTCCTC      | 245             |

|      |                |                           |                            |     |
|------|----------------|---------------------------|----------------------------|-----|
| 1C01 | <i>CLEC16A</i> | CCACCATTTCCTGCTCT         | CACTGGGGTCCCTACCAG         | 252 |
| 1C02 | <i>KCNJ11</i>  | TGCCTTCCTTTTCTCCATTG      | GCATGCTTGCTGAAGATGAG       | 204 |
| 1C03 | <i>KCNJ11</i>  | TCATGAAGACTGCCAAGC        | GCCACCAGGAAGATGCTG         | 256 |
| 1C04 | <i>KCNJ11</i>  | ATGCAGGTGGTACGCAAGAC      | ATCTCATCGGCCAGGTAGG        | 278 |
| 1C05 | <i>KCNJ11</i>  | GACCTGCACCACCACCAG        | AGGCTGTGGTCCTCATCAAG       | 245 |
| 1C06 | <i>KCNJ11</i>  | TTGTGCCCATGTAGCTGAG       | GCCGGGCTACATAACCACAT       | 294 |
| 1C07 | <i>SH2B3</i>   | CAAGCCTTGAGTACCCCAAC      | ATGTCTGTCCGGTCCTTCAC       | 241 |
| 1C08 | <i>SH2B3</i>   | TACAGCAGACCCAACCCTGT      | TGCATCTCTGCTTCTGTGCT       | 248 |
| 1C09 | <i>SH2B3</i>   | ACCTGCCCAGATCCTTAACC      | CCCAGGAGAAGCACCTGTTA       | 258 |
| 1C10 | <i>SH2B3</i>   | AGGCCATTGTCTTCTGGGTA      | ACCAGGAACACTCCATGAGC       | 243 |
| 1C11 | <i>SH2B3</i>   | CATTCCTGTCTGCTACCC        | TCCCTCTAGGACCCTGAACTC      | 247 |
| 1C12 | <i>SH2B3</i>   | AGCCCACCATCCTCTCCT        | GCCTCTACCCTTACCCAGTG       | 256 |
| 1D01 | <i>SH2B3</i>   | TCTGTGTCCTGTCAGCACTTG     | AAGGCACCAGGTGGAAGAT        | 247 |
| 1D02 | <i>SH2B3</i>   | GCTCAGCCCAGAGGGTCT        | ACTTCTGCCTGTGCTCCTCA       | 256 |
| 1D03 | <i>KCNJ11</i>  | CCTGCAGGACGTGTTCA         | CCCCAAAGCCAATAGTC          | 240 |
| 1D04 | <i>PTPN2</i>   | GCTGTGGAGAATTTAAGAGGGATA  | TTTTCACTACATCCTGCCTCCT     | 210 |
| 1D05 | <i>PTPN2</i>   | GGCACAGAAGTGGGGTTTAT      | CATCGCACTGTCACTCAGG        | 258 |
| 1D06 | <i>PTPN2</i>   | TGAAATGACAGTTGTGGTTTATCA  | CATTCATTTCCAAAAGAAGTCAAG   | 245 |
| 1D07 | <i>PTPN2</i>   | TTAACAAGGCCTTCCTGGAG      | TATTGGCCCCAAAATGAAAA       | 253 |
| 1D08 | <i>PTPN2</i>   | GCATGTATATATCTGGTTTGTTCAT | TTTCGGGCAAGAAAGGTCT        | 252 |
| 1D09 | <i>PTPN2</i>   | GTCTTAAAGCGTAGAAACCATGA   | AAAAATCCATTTTGCAGTAGAAA    | 240 |
| 1D10 | <i>PTPN2</i>   | AACTTCTCCCTTGATTTTCACTTT  | TCAATGAGATTAAAATGAGATCGTAA | 275 |
| 1D11 | <i>PTPN2</i>   | TCCTGGGTTCCAATAACAAG      | TGCAGTTATTTGATGCTATGTGT    | 267 |
| 1D12 | <i>PTPN2</i>   | TGTTTTTCATTTCTTCCCTACC    | AGCCTCATTTTCAGCCTGT        | 246 |
| 1E01 | <i>PTPN2</i>   | TCCTGCTCTGTGTGCACTTC      | AAGCTTGCTGGGCAAATA         | 280 |
| 1E02 | <i>PTPN2</i>   | TGCATCTATGTTTCGTCTGTGTG   | TGCTCTTCATCCCCTGGA         | 257 |
| 1E03 | <i>PTPN2</i>   | GTAAACCACAGCCTTCAGCA      | CCCTGAGAGGGTACATACAG       | 244 |
| 1E04 | <i>PTPN2</i>   | GGAAGATTAATTTTTCTTGGAATCT | GTTGTCAATGCCATGTTCCA       | 252 |

|      |               |                            |                             |     |
|------|---------------|----------------------------|-----------------------------|-----|
| 1E05 | <i>PTPN22</i> | ACTTGTTCACTCATGAGCATACTA   | TTTTTGGGTATCTAGAGAAATATGGAA | 231 |
| 1E06 | <i>PTPN22</i> | AGCGGAGGACTAGGTGAGAA       | AAGATGCCTGAACCTGAAG         | 260 |
| 1E07 | <i>PTPN22</i> | TTCTGAGTCTGGGATCCATGT      | CCCAAACCTGAAAACCTATGAAGATG  | 251 |
| 1E08 | <i>PTPN22</i> | GCTGAATTTGCTTCCAAATGA      | TTTTTCAGCTTCCTAAAAAGAAAAAG  | 271 |
| 1E09 | <i>PTPN22</i> | TGTGTAAGTGTAATGTCTGTTCTCAT | TGTCTTATGCCCAGCCTGA         | 259 |
| 1E10 | <i>PTPN22</i> | GGTGGTTTTTCAGCCCTTG        | TGGCCAGACTCTGACATTTG        | 255 |
| 1E11 | <i>PTPN22</i> | TGTCCCCAGGTATCTTCTTCC      | TGTTTTGAAAAACCAAACAATTAC    | 259 |
| 1E12 | <i>PTPN22</i> | GATGCCATGGAAGTACAAGACT     | TTTTGGATGCCTCACCATTA        | 241 |
| 1F01 | <i>PTPN22</i> | ATCTGGTCCTGTTCGTTACC       | ATAAATCCTGCAACAAATCTGACA    | 240 |
| 1F02 | <i>PTPN22</i> | CACTGAAAACCAGCCTCTGA       | AAAGAAAGCGTAATGATGACACC     | 240 |
| 1F03 | <i>PTPN22</i> | TGACTAATTGTGTCTGGGAGATG    | CTTGATTTAGCAGGGTGCAA        | 240 |
| 1F04 | <i>PTPN22</i> | CTTCTTCCTTTGACTTTAGGACTTCT | CTGCTGCATTTACAGGTTTAGA      | 250 |
| 1F05 | <i>PTPN22</i> | TAGTTGGGGAGCCTCTTCAG       | TTGAGCCTGCATCTCTACAAAA      | 250 |
| 1F06 | <i>PTPN22</i> | GGAATCTCAACCACATGATTCT     | AAATCAAGAGACATCTTAGAACTGG   | 243 |
| 1F07 | <i>PTPN22</i> | CATCATGGCCTCCAAGTG         | AAATGAAATCTAAAATTCTATGCAAAC | 242 |
| 1F08 | <i>PTPN22</i> | AAGAATTCCTTTGGATTGTTCTAA   | CTCAAGGCTCACACATCAGC        | 246 |
| 1F09 | <i>PTPN22</i> | GAACCGAACTATATTCACTTTCTTCC | GGATTTATTGAATGATGGGTGTT     | 250 |
| 1F10 | <i>PTPN22</i> | GATGCCATTTCATAATTCAGCA     | TCCAATCTTAGGGCTAAATGTCA     | 248 |
| 1F11 | <i>PTPN22</i> | AAGAGAAAAGGGTGTTGACTTATGA  | CATTTTTGTACCTTTCCATTTAGGT   | 250 |
| 1F12 | <i>PTPN22</i> | GGTATGCAATGGAACATGTTTTT    | GGCATGTTTCCCAAACTCT         | 190 |
| 1G01 | <i>PTPN22</i> | TGGCAAGATGGAAAAACAAC       | AAGGAGGCCTATGGGTGATT        | 332 |
| 1G02 | <i>PTPN22</i> | TCAACAGTCATCTGAGTCTGTCTT   | AACATAAGGACCTATACATGCAACC   | 249 |
| 1G03 | <i>PTPN22</i> | TTAAAACATCTTTCTTTTCATTCAAC | GGCACTTATTGGCATTTTGC        | 272 |
| 1G04 | <i>IL2RA</i>  | ATCTTCCCATCCCACATCCT       | GGACTCCCTCTGGTTCTGTG        | 260 |
| 1G05 | <i>IL2RA</i>  | ACAAAAGTAGGGCATAACCATC     | TTTTATTCTGCGGAAACCTCT       | 241 |
| 1G06 | <i>IL2RA</i>  | TGGCCTACAAGGAAGGAAC        | GCCCATTTGTGTCTATAGGG        | 241 |
| 1G07 | <i>IL2RA</i>  | CTGGACAGGTGTGCTTCTCA       | GCGCTAGCAGGAGTTAGCTG        | 249 |

|      |               |                            |                          |     |
|------|---------------|----------------------------|--------------------------|-----|
| 1G08 | <i>IL2RA</i>  | TAGCAAGAGGCAACCTGGAC       | GGTCTCCATTTACCTGTGC      | 277 |
| 1G09 | <i>IL2RA</i>  | TCCAGGGATACAGGGCTCTAC      | CCAGGGAGATCAAGGGTCTT     | 249 |
| 1G10 | <i>IL2RA</i>  | GGCCCTGACTCCTGTGTTTA       | GTCCAGCGTTTGTCTTCTCC     | 149 |
| 1G11 | <i>IL2RA</i>  | CCTGACTTCCTTTAGCCTCGT      | CTGTCCATATCTCAGCCTGGT    | 202 |
| 1G12 | <i>IL2RA</i>  | CATGGGGAGGGACCTACTTC       | CCTTGGTGATGCCACACTT      | 243 |
| 1H01 | <i>IL2RA</i>  | AGCCTGGCCAACATAGCA         | TCACTTGGGCTTCATGACTTC    | 243 |
| 1H02 | <i>IAN4L1</i> | CCAGCTCCCAAACGTACATC       | GAATGGGTTTCTGCCACTGT     | 202 |
| 1H03 | <i>IAN4L1</i> | GGGGAGGACGTTTCATAGCTT      | ACTGACTGGGCCCTCAGC       | 242 |
| 1H04 | <i>IAN4L1</i> | AACACCACCGGCATTGAG         | GGCAGAGAGCAGGTAGCAGT     | 256 |
| 1H05 | <i>IAN4L1</i> | GCCGATACCCAAGAGCTGTA       | GCAGTTGTCCGTGTTTGCTA     | 243 |
| 1H06 | <i>IAN4L1</i> | CAGGCCCTGGATGACTATG        | TTCCACTTTGGCCTGGTACT     | 276 |
| 1H07 | <i>IAN4L1</i> | AGCTCCTGGCTGTGATTGAG       | GCAAAAGCATCAAGTGTTTGAC   | 240 |
| 1H08 | <i>IAN4L1</i> | GAGCTGAGGGAGAACGAGAG       | CATGCTCCATAGACCACGAG     | 249 |
| 1H09 | <i>IFIH1</i>  | ACAACAGCACCATCTGCTTG       | GCAGGCAGAAAGGTCAGGTA     | 171 |
| 1H10 | <i>IFIH1</i>  | TACATCCAGGTGGAGCCTGT       | AGAGTGGGCTGAAGGAGGTT     | 302 |
| 1H11 | <i>IFIH1</i>  | GACTCGGGAATTCGTGGA         | TGCTTTGCAAAATCTGCCTA     | 280 |
| 1H12 | <i>IFIH1</i>  | GGTTATTCAGAAGATGTTTGATCTTA | TCACTAGGCAGAATTTGAAGAAT  | 269 |
| 2A01 | <i>IFIH1</i>  | TGTATGGCACTATGATTTGCATT    | CCCACATTTTCTCCCTCTGA     | 283 |
| 2A02 | <i>IFIH1</i>  | TGTGCTGTAGAGGTGTGCAGT      | TGCTTCCACTATATGGCGTCT    | 248 |
| 2A03 | <i>IFIH1</i>  | GGCCTACGTTTCAGTTTCAGG      | TCCTTGGCAATGTAAACAGC     | 240 |
| 2A04 | <i>IFIH1</i>  | GGCCTACGTTTCAGTTTCAGG      | CAATGACACAAATGCCATCA     | 383 |
| 2A05 | <i>IFIH1</i>  | CCTCTTTTCATGCTGGATGC       | TTTCAAGGATTTGAGCTGTACTGA | 257 |
| 2A06 | <i>IFIH1</i>  | TGGATTAAGTGGTGATACCCAAC    | AAAGACAATTTAAGCCACGAACA  | 247 |
| 2A07 | <i>IFIH1</i>  | TGTGCTGATATGGAGAAATGAAC    | TTCAGCTTTGGCTTGCTTC      | 246 |
| 2A08 | <i>IFIH1</i>  | TTTGATGCAGAAGTTGAAAAACA    | AACTGATGATCACAGCACTTGAA  | 249 |
| 2A09 | <i>IFIH1</i>  | CGTTGAATAAAGTGAAAGGGAAA    | AGCCTTTGCCATCTTTCTACTG   | 245 |
| 2A10 | <i>IFIH1</i>  | TTGGAGATTCAGCAGAGGT        | TTGGAACACTTTTGCTTTCCA    | 464 |
| 2A11 | <i>IFIH1</i>  | GGCACAATTTTAGGGGGTTT       | ATCATCACCACCCTCATCACT    | 249 |

|      |              |                            |                           |     |
|------|--------------|----------------------------|---------------------------|-----|
| 2A12 | <i>IFIH1</i> | CAATTCGAATGATAGATGCGTA     | TGGAGAGCTTATGAGAAGCAGTAA  | 277 |
| 2B01 | <i>IFIH1</i> | CAAGCTTGTTAACATATCAACTCTAA | GATCATGCCACTGCTCTTCA      | 430 |
| 2B02 | <i>IFIH1</i> | TTTGATTTACTGACCAGTTGC      | TGGCTATTTTCATTGGTGACG     | 246 |
| 2B03 | <i>IFIH1</i> | TCGCACTGGAAAAATAAATCTG     | AACAGGAAAAAGGCTTTGTTTTA   | 246 |
| 2B04 | <i>IFIH1</i> | AGGATTTGTATCACAACTACCC     | CAAATTCAGAGGTGACCAACAA    | 241 |
| 2B05 | <i>IFIH1</i> | AAGACCTCCAAATTTTCAGGAGA    | TTTCTCAATTACATGGATATCTTCC | 247 |
| 2B06 | <i>IFIH1</i> | GAATAACCCATCACTAATAACTTTCC | TTGAGAGGCTAAAGGAGAGGAA    | 246 |
| 2B07 | <i>IFIH1</i> | TCCATGATGATTCTTTCCCTTT     | TTGTGCACCATCATTGTTCC      | 249 |
| 2B08 | <i>IFIH1</i> | GCCAACAGGAATGTTTAATTGC     | CAATCAAGTGCTAATCCTCATCAC  | 255 |
| 2B09 | <i>AIRE</i>  | GGGAGCTCCACCCTCTAGTC       | AGACGGTCCTGGAACATCAC      | 387 |
| 2B10 | <i>AIRE</i>  | ACCCTACCCCTGGAGAAAAC       | CCGGGAAGACTGGAGACC        | 261 |
| 2B11 | <i>AIRE</i>  | GCACTACCCCCACTGAGA         | CACCAGGCCAGCACGTC         | 250 |
| 2B12 | <i>AIRE</i>  | GCCTGCTTCTGGCATAGAGT       | GTGGTCCTCCTTCCATCTTG      | 258 |
| 2C01 | <i>AIRE</i>  | GGCCTACACGACTGCCAAG        | AGAGCCACTCCCCAGAG         | 297 |
| 2C02 | <i>AIRE</i>  | CTGGTGCCACAGCCATGT         | CCTGAGTGCCAGGTAAAGG       | 241 |
| 2C03 | <i>AIRE</i>  | GCAGAGACTGGGGAGTTCAG       | AGAACCCCTTTCCATCTTGG      | 357 |
| 2C04 | <i>AIRE</i>  | CCCTCTGTGAAAAGACATGGT      | CTGCAGGAGACCACAAGGA       | 386 |
| 2C05 | <i>AIRE</i>  | GTTTCAGGGTCCCAGCAGT        | CTCCCTCTCCTCCTGTTTCA      | 358 |
| 2C06 | <i>AIRE</i>  | CTCCTCACTTGCGCCTAGA        | GTGTGGTTGTGGGCTGTATG      | 349 |
| 2C07 | <i>AIRE</i>  | AGCCCCTCATCCTCTGCT         | TCTGCCCTGAGATGTGCTC       | 214 |
| 2C08 | <i>AIRE</i>  | TGGGCTGACCTCTTCTCTTT       | AGCAGGGACAGCCTGAGTT       | 231 |
| 2C09 | <i>AIRE</i>  | AACGATGGCCATGATTCTGT       | AGTAGGTCACCAGGCAAGGA      | 385 |
| 2C10 | <i>FOXP3</i> | GGCTCAGGTGGTCGAGTATC       | GGAAGAAGAGGAGGCATGG       | 272 |
| 2C11 | <i>FOXP3</i> | CAAAGCCTCAGACCTGCTG        | CCCAGTGCCACAGTAAAGGT      | 201 |
| 2C12 | <i>FOXP3</i> | CTACCATGTGGGCTTGCAGT       | CACAGTTCTCCCACCTGCTC      | 246 |
| 2D01 | <i>FOXP3</i> | ACCAGGTATGGACGGTGAAT       | TCTGTGAAGCCATGGGGTA       | 277 |
| 2D02 | <i>FOXP3</i> | GGGAGTCAGGGTTTTTCGAG       | GTGTCAGGGGAGGGGATAG       | 257 |
| 2D03 | <i>FOXP3</i> | AGGACAGGTCAGTGGACAGG       | TATTGGGATGAAGCCTGAGC      | 271 |



|      |               |                         |                        |     |
|------|---------------|-------------------------|------------------------|-----|
| 2D04 | <i>FOXP3</i>  | GGTCACCTGCATGGAATCTT    | CTACGGTCTTCCCTGGGAGT   | 263 |
| 2D05 | <i>FOXP3</i>  | GCCAGAAACCAAGTTCACCT    | CAGTCTGAGTCTGCCACCAC   | 261 |
| 2D06 | <i>FOXP3</i>  | TTTAAGCCTCTGGGTCACCA    | CCCAGAGCCTGTCAGGATTA   | 250 |
| 2D07 | <i>FOXP3</i>  | TGATTCATCCCCACCCTCT     | GGAATGGAGGAACCCACTCT   | 213 |
| 2D08 | <i>FOXP3</i>  | TAGCCCCTCTAAACCCCAAG    | ATGTGCCTATGAGCCCAGAC   | 254 |
| 2D09 | <i>FOXP3</i>  | GTCTGGGCTCATAGGCACAT    | TCCTCCTTTCCTTGATCTTGA  | 280 |
| 2D10 | <i>KCNJ11</i> | CTCAGAAGTGAGGCCAGCA     | GCCTTTCTTGACACAAAGC    | 261 |
| 2D11 | <i>KCNJ11</i> | ATCATCCCCGAGGAATACG     | GGACATGGTGAAGATGAGCA   | 216 |
| 2D12 | <i>IFIH1</i>  | TCTGTACATTGTGGAGTGGCTAA | TTCAGTAATCCACTGGGAAAGC | 240 |

---

Table S2. Association analysis of common variants in sequenced pools of DNA from T1D patients and controls

| Gene           | rs#        | Major allele | Minor allele | T1D                        |                |                 |                                            | Controls                   |                |                 |                                            | <i>P</i> -value, $\chi^2$ test |
|----------------|------------|--------------|--------------|----------------------------|----------------|-----------------|--------------------------------------------|----------------------------|----------------|-----------------|--------------------------------------------|--------------------------------|
|                |            |              |              | reads with minor allele, n | total reads, n | minor allele, % | estimated chromosomes with minor allele, n | reads with minor allele, n | total reads, n | minor allele, % | estimated chromosomes with minor allele, n |                                |
| <i>SH2B3</i>   | rs3184504  | T            | c            | 19,777                     | 47,620         | 41.5            | 399 / 960                                  | 22,868                     | 43,163         | 53.0            | 509 / 960                                  | 0.0000050                      |
| <i>PTPN22</i>  | rs2476601  | C            | t            | 4,496                      | 30,364         | 14.8            | 142 / 960                                  | 2,531                      | 30,042         | 8.4             | 81 / 960                                   | 0.000013                       |
| <i>IFIH1</i>   | rs1990760  | A            | g            | 8,055                      | 25,955         | 31.0            | 298 / 960                                  | 11,606                     | 30,326         | 38.3            | 367 / 960                                  | 0.00086                        |
| <i>CLEC16A</i> | rs2302557  | G            | c            | 4,135                      | 8,353          | 49.5            | 475 / 960                                  | 3,108                      | 7,134          | 43.6            | 418 / 960                                  | 0.0091                         |
| <i>IL2RA</i>   | rs28360490 | T            | g            | 4,828                      | 59,233         | 8.2             | 78 / 960                                   | 7,269                      | 62,449         | 11.6            | 112 / 960                                  | 0.010                          |
| <i>CLEC16A</i> | rs2286973  | G            | a            | 6,466                      | 18,427         | 35.1            | 337 / 960                                  | 6,084                      | 14,990         | 40.6            | 390 / 960                                  | 0.013                          |
| <i>IL2RA</i>   | rs28360489 | G            | a            | 4,892                      | 58,370         | 8.4             | 80 / 960                                   | 7,268                      | 62,133         | 11.7            | 112 / 960                                  | 0.016                          |
| <i>IL2RA</i>   | rs7076103  | G            | a            | 2,811                      | 19,005         | 14.8            | 142 / 960                                  | 3,230                      | 17,225         | 18.8            | 180 / 960                                  | 0.020                          |
| <i>KCNJ11</i>  | rs5215     | A            | g            | 5,136                      | 14,603         | 35.2            | 338 / 960                                  | 3,871                      | 12,464         | 31.1            | 298 / 960                                  | 0.056                          |
| <i>AIRE</i>    | rs1800521  | T            | c            | 3,967                      | 10,740         | 36.9            | 355 / 960                                  | 2,757                      | 8,408          | 32.8            | 315 / 960                                  | 0.057                          |
| <i>PTPN22</i>  | rs3761935  | A            | c            | 3,518                      | 19,264         | 18.3            | 175 / 960                                  | 6,655                      | 31,167         | 21.4            | 205 / 960                                  | 0.089                          |
| <i>AIRE</i>    | rs1133779  | T            | c            | 1,255                      | 2,809          | 44.7            | 429 / 960                                  | 979                        | 2,389          | 41.0            | 393 / 960                                  | 0.097                          |
| <i>KCNJ11</i>  | rs5218     | C            | t            | 4,790                      | 16,534         | 29.0            | 278 / 960                                  | 5,005                      | 15,642         | 32.0            | 307 / 960                                  | 0.15                           |
| <i>IFIH1</i>   | rs11441874 | T            | a            | 1,390                      | 19,769         | 7.0             | 67 / 960                                   | 1,447                      | 26,350         | 5.5             | 53 / 960                                   | 0.16                           |
| <i>CLEC16A</i> | rs8052325  | A            | g            | 5,649                      | 69,044         | 8.2             | 79 / 960                                   | 6,595                      | 66,437         | 9.9             | 95 / 960                                   | 0.18                           |
| <i>PTPN22</i>  | rs1217418  | C            | t            | 13,809                     | 29,699         | 46.5            | 446 / 960                                  | 16,700                     | 38,298         | 43.6            | 419 / 960                                  | 0.20                           |
| <i>KCNJ11</i>  | rs1800467  | C            | g            | 539                        | 20,174         | 2.7             | 26 / 960                                   | 581                        | 15,923         | 3.6             | 35 / 960                                   | 0.22                           |
| <i>KCNJ11</i>  | rs5219     | G            | a            | 14,332                     | 37,331         | 38.4            | 369 / 960                                  | 13,310                     | 37,209         | 35.8            | 343 / 960                                  | 0.23                           |
| <i>IAN4L1</i>  | rs759011   | C            | t            | 8,445                      | 31,823         | 26.5            | 255 / 960                                  | 8,317                      | 28,798         | 28.9            | 277 / 960                                  | 0.25                           |

|                |            |   |   |        |        |      |           |        |        |      |           |      |
|----------------|------------|---|---|--------|--------|------|-----------|--------|--------|------|-----------|------|
| <i>AIRE</i>    | rs1800525  | G | a | 672    | 10,794 | 6.2  | 60 / 960  | 613    | 8,141  | 7.5  | 72 / 960  | 0.26 |
| <i>AIRE</i>    | rs878081   | C | t | 5,195  | 27,323 | 19.0 | 183 / 960 | 5,090  | 24,254 | 21.0 | 201 / 960 | 0.28 |
| <i>IAN4LI</i>  | rs1046355  | C | t | 5,117  | 19,682 | 26.0 | 250 / 960 | 5,417  | 19,258 | 28.1 | 270 / 960 | 0.29 |
| <i>AIRE</i>    | rs1800520  | C | g | 1,076  | 14,438 | 7.5  | 72 / 960  | 871    | 13,788 | 6.3  | 61 / 960  | 0.33 |
| <i>PTPN22</i>  | rs1217419  | C | a | 12,122 | 25,470 | 47.6 | 457 / 960 | 10,793 | 23,765 | 45.4 | 436 / 960 | 0.34 |
| <i>IL2RA</i>   | rs11256369 | G | c | 12,321 | 49,266 | 25.0 | 240 / 960 | 11,285 | 48,636 | 23.2 | 223 / 960 | 0.35 |
| <i>AIRE</i>    | rs1055311  | C | t | 1,866  | 6,925  | 26.9 | 259 / 960 | 1,612  | 5,600  | 28.8 | 276 / 960 | 0.37 |
| <i>CLEC16A</i> | rs16957839 | C | t | 4,219  | 45,947 | 9.2  | 88 / 960  | 4,371  | 42,648 | 10.2 | 98 / 960  | 0.43 |
| <i>CLEC16A</i> | rs2302558  | C | t | 2,218  | 23,383 | 9.5  | 91 / 960  | 2,744  | 26,745 | 10.3 | 98 / 960  | 0.57 |
| <i>IFIH1</i>   | rs3747517  | G | a | 12,013 | 47,867 | 25.1 | 241 / 960 | 12,522 | 47,796 | 26.2 | 252 / 960 | 0.58 |
| <i>IL2RA</i>   | rs12358961 | A | t | 16,836 | 49,011 | 34.4 | 330 / 960 | 16,294 | 48,334 | 33.7 | 324 / 960 | 0.77 |
| <i>IAN4LI</i>  | rs9657881  | G | a | 1,010  | 18,910 | 5.3  | 51 / 960  | 977    | 19,369 | 5.0  | 48 / 960  | 0.77 |
| <i>IAN4LI</i>  | rs4725936  | T | c | 12,886 | 52,009 | 24.8 | 238 / 960 | 14,360 | 56,703 | 25.3 | 243 / 960 | 0.78 |
| <i>AIRE</i>    | rs41277544 | G | a | 1,208  | 26,472 | 4.6  | 44 / 960  | 1,121  | 24,038 | 4.7  | 45 / 960  | 0.92 |

Table S3. Association analysis of rare variants in sequenced pools of DNA from T1D patients and controls

| Gene         | Location           | rs# or<br>ss# (for new<br>SNPs) | Major<br>allele | Minor<br>allele | T1D                                 |                   |                       |                                                     | Controls                            |                   |                       |                                                     | P-value,<br>exact test |
|--------------|--------------------|---------------------------------|-----------------|-----------------|-------------------------------------|-------------------|-----------------------|-----------------------------------------------------|-------------------------------------|-------------------|-----------------------|-----------------------------------------------------|------------------------|
|              |                    |                                 |                 |                 | reads<br>with<br>minor<br>allele, n | total<br>reads, n | minor<br>allele,<br>% | estimated<br>chromosomes<br>with minor<br>allele, n | reads<br>with<br>minor<br>allele, n | total<br>reads, n | minor<br>allele,<br>% | estimated<br>chromosomes<br>with minor<br>allele, n |                        |
| <i>IFIH1</i> | intron 4           | rs35502110                      | C               | t               | 474                                 | 39,047            | 1.2                   | 12 / 960                                            | 506                                 | 33,156            | 1.5                   | 15 / 960                                            | 0.70                   |
| <i>IFIH1</i> | exon 7, H460R      | rs10930046                      | A               | g               | 403                                 | 43,256            | 0.9                   | 9 / 960                                             | 310                                 | 43,781            | 0.7                   | 7 / 960                                             | 0.80                   |
| <i>IFIH1</i> | exon 14, I923V     | rs35667974                      | A               | g               | 261                                 | 36,095            | 0.7                   | 7 / 960                                             | 906                                 | 37,475            | 2.4                   | 23 / 960                                            | 0.0049                 |
| <i>IFIH1</i> | intron 14,+1splice | rs35732034                      | G               | a               | 221                                 | 34,941            | 0.6                   | 6 / 960                                             | 455                                 | 37,386            | 1.2                   | 12 / 960                                            | 0.24                   |
| <i>IFIH1</i> | exon 7, sSNP       | rs12479043                      | G               | c               | 161                                 | 35,462            | 0.5                   | 4 / 960                                             | 83                                  | 33,280            | 0.2                   | 2 / 960                                             | 0.69                   |
| <i>IFIH1</i> | intron 8,+1splice  | rs35337543                      | G               | c               | 35                                  | 9,719             | 0.4                   | 3 / 960                                             | 221                                 | 8,808             | 2.5                   | 24 / 960                                            | 0.000044               |
| <i>IFIH1</i> | exon 10, E627X     | rs35744605                      | G               | t               | 84                                  | 29,557            | 0.3                   | 3 / 960                                             | 169                                 | 29,844            | 0.6                   | 5 / 960                                             | 0.73                   |
| <i>IFIH1</i> | exon 5, K349R      | ss107794691                     | A               | g               | 37                                  | 14,332            | 0.3                   | 2 / 960                                             | 58                                  | 14,309            | 0.4                   | 4 / 960                                             | 0.69                   |
| <i>IFIH1</i> | exon 1, sSNP       | ss119336615                     | G               | a               | 57                                  | 23,188            | 0.2                   | 2 / 960                                             | 1                                   | 20,541            | 0.0                   | 0 / 960                                             | 0.50                   |
| <i>IFIH1</i> | intron 3           | ss107794692                     | A               | t               | 66                                  | 30,460            | 0.2                   | 2 / 960                                             | 66                                  | 28,675            | 0.2                   | 2 / 960                                             | 1.00                   |
| <i>IFIH1</i> | intron 4           | ss119336620                     | C               | g               | 48                                  | 39,161            | 0.1                   | 1 / 960                                             | 0                                   | 33,227            | 0.0                   | 0 / 960                                             | 1.00                   |
| <i>IFIH1</i> | intron 4           | ss119336619                     | C               | g               | 45                                  | 38,774            | 0.1                   | 1 / 960                                             | 40                                  | 39,650            | 0.1                   | 1 / 960                                             | 1.00                   |
| <i>IFIH1</i> | exon 11, T702I     | ss107794690                     | C               | t               | 22                                  | 21,083            | 0.1                   | 1 / 960                                             | 77                                  | 20,056            | 0.4                   | 4 / 960                                             | 0.37                   |
| <i>IFIH1</i> | intron 5           | ss119336622                     | G               | a               | 33                                  | 35,210            | 0.1                   | 1 / 960                                             | 29                                  | 35,799            | 0.1                   | 1 / 960                                             | 1.00                   |
| <i>IFIH1</i> | intron 3           | ss119336618                     | C               | t               | 28                                  | 30,575            | 0.1                   | 1 / 960                                             | 5                                   | 28,684            | 0.0                   | 0 / 960                                             | 1.00                   |
| <i>IFIH1</i> | exon 7, sSNP       | ss119336624                     | C               | t               | 28                                  | 42,289            | 0.1                   | 1 / 960                                             | 3                                   | 43,784            | 0.0                   | 0 / 960                                             | 1.00                   |
| <i>IFIH1</i> | intron 12          | ss119336629                     | T               | c               | 15                                  | 23,643            | 0.1                   | 1 / 960                                             | 1                                   | 21,166            | 0.0                   | 0 / 960                                             | 1.00                   |
| <i>IFIH1</i> | intron 12          | ss119336630                     | T               | a               | 29                                  | 47,745            | 0.1                   | 1 / 960                                             | 0                                   | 48,069            | 0.0                   | 0 / 960                                             | 1.00                   |
| <i>IFIH1</i> | intron 11          | ss119336627                     | T               | c               | 18                                  | 31,712            | 0.1                   | 1 / 960                                             | 0                                   | 35,470            | 0.0                   | 0 / 960                                             | 1.00                   |

|              |                |             |   |   |     |        |     |          |     |        |     |          |       |
|--------------|----------------|-------------|---|---|-----|--------|-----|----------|-----|--------|-----|----------|-------|
| <i>IFIH1</i> | exon 2, N160D  | ss119336617 | A | g | 0   | 27,046 | 0.0 | 0 / 960  | 40  | 24,529 | 0.2 | 2 / 960  | 0.50  |
| <i>IFIH1</i> | exon 16, sSNP  | ss119336633 | C | t | 16  | 33,439 | 0.0 | 0 / 960  | 35  | 36,251 | 0.1 | 1 / 960  | 1.00  |
| <i>IFIH1</i> | exon 13, R820H | ss119336631 | G | a | 10  | 48,168 | 0.0 | 0 / 960  | 34  | 48,145 | 0.1 | 1 / 960  | 1.00  |
| <i>IFIH1</i> | exon 12, sSNP  | ss119336628 | C | t | 3   | 24,346 | 0.0 | 0 / 960  | 23  | 21,332 | 0.1 | 1 / 960  | 1.00  |
| <i>IFIH1</i> | exon 16, V988L | ss119336634 | G | t | 4   | 33,792 | 0.0 | 0 / 960  | 45  | 36,255 | 0.1 | 1 / 960  | 1.00  |
| <i>IFIH1</i> | intron 14      | ss119336632 | A | g | 2   | 35,269 | 0.0 | 0 / 960  | 40  | 37,416 | 0.1 | 1 / 960  | 1.00  |
| <i>IFIH1</i> | exon 6, E428G  | ss119336623 | A | g | 1   | 19,220 | 0.0 | 0 / 960  | 35  | 26,514 | 0.1 | 1 / 960  | 1.00  |
| <i>IFIH1</i> | exon 1, R149G  | ss119336616 | A | g | 1   | 23,102 | 0.0 | 0 / 960  | 22  | 20,558 | 0.1 | 1 / 960  | 1.00  |
| <i>IFIH1</i> | exon 10, R595H | ss119336626 | G | a | 1   | 27,125 | 0.0 | 0 / 960  | 29  | 29,774 | 0.1 | 1 / 960  | 1.00  |
| <i>IFIH1</i> | intron 7       | ss119336625 | T | c | 1   | 35,400 | 0.0 | 0 / 960  | 33  | 33,057 | 0.1 | 1 / 960  | 1.00  |
| <i>AIRE</i>  | exon 12, R471C | ss107794714 | C | t | 499 | 30,860 | 1.6 | 16 / 960 | 500 | 23,119 | 2.2 | 21 / 960 | 0.51  |
| <i>AIRE</i>  | intron 5       | rs41277546  | C | t | 343 | 26,698 | 1.3 | 12 / 960 | 532 | 24,489 | 2.2 | 21 / 960 | 0.16  |
| <i>AIRE</i>  | intron 10      | ss107794713 | C | t | 137 | 13,747 | 1.0 | 10 / 960 | 150 | 11,830 | 1.3 | 12 / 960 | 0.83  |
| <i>AIRE</i>  | 3'UTR          | ss107794717 | C | g | 48  | 5,536  | 0.9 | 8 / 960  | 46  | 4,499  | 1.0 | 10 / 960 | 0.81  |
| <i>AIRE</i>  | intron 4       | ss107794708 | G | t | 56  | 6,652  | 0.8 | 8 / 960  | 73  | 7,132  | 1.0 | 10 / 960 | 0.81  |
| <i>AIRE</i>  | intron 13      | ss107794716 | C | t | 262 | 37,459 | 0.7 | 7 / 960  | 39  | 32,013 | 0.1 | 1 / 960  | 0.070 |
| <i>AIRE</i>  | exon 11, T441M | ss107794712 | C | t | 57  | 14,711 | 0.4 | 4 / 960  | 34  | 11,847 | 0.3 | 3 / 960  | 1.00  |
| <i>AIRE</i>  | exon 10, sSNP  | ss107794711 | G | a | 32  | 10,902 | 0.3 | 3 / 960  | 11  | 8,382  | 0.1 | 1 / 960  | 0.62  |
| <i>AIRE</i>  | exon 12, sSNP  | ss107794715 | C | t | 90  | 31,258 | 0.3 | 3 / 960  | 67  | 23,211 | 0.3 | 3 / 960  | 1.00  |
| <i>AIRE</i>  | exon 10, sSNP  | ss119336604 | C | g | 23  | 10,780 | 0.2 | 2 / 960  | 0   | 8,383  | 0.0 | 0 / 960  | 0.50  |
| <i>AIRE</i>  | intron 6       | ss107794710 | G | a | 30  | 14,368 | 0.2 | 2 / 960  | 21  | 13,798 | 0.2 | 1 / 960  | 1.00  |
| <i>AIRE</i>  | exon 3, sSNP   | ss119336600 | G | a | 20  | 10,160 | 0.2 | 2 / 960  | 3   | 8,037  | 0.0 | 0 / 960  | 0.50  |
| <i>AIRE</i>  | exon 8, I309M  | ss119336602 | C | g | 21  | 20,841 | 0.1 | 1 / 960  | 0   | 17,253 | 0.0 | 0 / 960  | 1.00  |
| <i>AIRE</i>  | exon 12, sSNP  | rs7281600   | G | a | 29  | 31,073 | 0.1 | 1 / 960  | 11  | 23,098 | 0.0 | 0 / 960  | 1.00  |
| <i>AIRE</i>  | intron 12      | ss119336606 | G | a | 9   | 31,175 | 0.0 | 0 / 960  | 40  | 23,242 | 0.2 | 2 / 960  | 0.50  |

|                |                 |             |   |   |     |        |     |          |     |        |     |          |       |
|----------------|-----------------|-------------|---|---|-----|--------|-----|----------|-----|--------|-----|----------|-------|
| <i>AIRE</i>    | exon 4, sSNP    | ss107794707 | C | t | 1   | 6,721  | 0.0 | 0 / 960  | 26  | 7,138  | 0.4 | 3 / 960  | 0.25  |
| <i>AIRE</i>    | exon 5, V199I   | ss119336601 | G | a | 3   | 27,267 | 0.0 | 0 / 960  | 67  | 24,541 | 0.3 | 3 / 960  | 0.25  |
| <i>AIRE</i>    | exon 8, R328W   | ss119336603 | C | t | 1   | 20,124 | 0.0 | 0 / 960  | 21  | 17,221 | 0.1 | 1 / 960  | 1.00  |
| <i>CLEC16A</i> | 3'UTR           | rs11647285  | G | a | 942 | 44,026 | 2.1 | 21 / 960 | 811 | 31,847 | 2.5 | 24 / 960 | 0.76  |
| <i>CLEC16A</i> | intron 11       | ss107794687 | C | t | 431 | 40,186 | 1.1 | 10 / 960 | 808 | 32,947 | 2.5 | 24 / 960 | 0.023 |
| <i>CLEC16A</i> | exon 24, S991N  | ss107794725 | G | a | 213 | 33,615 | 0.6 | 6 / 960  | 112 | 25,129 | 0.4 | 4 / 960  | 0.75  |
| <i>CLEC16A</i> | intron 23       | ss107794688 | C | t | 168 | 33,712 | 0.5 | 5 / 960  | 450 | 25,138 | 1.8 | 17 / 960 | 0.016 |
| <i>CLEC16A</i> | exon 24, A1042T | ss107794727 | G | a | 187 | 45,728 | 0.4 | 4 / 960  | 34  | 32,146 | 0.1 | 1 / 960  | 0.37  |
| <i>CLEC16A</i> | exon 15, Y604I  | ss107794721 | T | a | 201 | 70,829 | 0.3 | 3 / 960  | 11  | 66,309 | 0.0 | 0 / 960  | 0.25  |
| <i>CLEC16A</i> | exon 24, V977M  | ss107794724 | G | a | 90  | 33,833 | 0.3 | 3 / 960  | 54  | 25,129 | 0.2 | 2 / 960  | 1.00  |
| <i>CLEC16A</i> | exon 22, S901N  | ss107794723 | G | a | 119 | 47,294 | 0.3 | 2 / 960  | 101 | 39,194 | 0.3 | 2 / 960  | 1.00  |
| <i>CLEC16A</i> | 3'UTR           | ss107794728 | G | a | 106 | 44,959 | 0.2 | 2 / 960  | 158 | 32,088 | 0.5 | 5 / 960  | 0.45  |
| <i>CLEC16A</i> | 5'UTR           | ss107794719 | G | t | 29  | 12,665 | 0.2 | 2 / 960  | 34  | 10,159 | 0.3 | 3 / 960  | 1.00  |
| <i>CLEC16A</i> | 5'UTR           | ss107794718 | G | a | 24  | 12,679 | 0.2 | 2 / 960  | 30  | 10,217 | 0.3 | 3 / 960  | 1.00  |
| <i>CLEC16A</i> | exon 17, R674W  | ss119336668 | C | t | 35  | 20,409 | 0.2 | 2 / 960  | 4   | 17,557 | 0.0 | 0 / 960  | 0.50  |
| <i>CLEC16A</i> | intron 13       | ss119336661 | C | t | 24  | 14,088 | 0.2 | 2 / 960  | 2   | 10,881 | 0.0 | 0 / 960  | 0.50  |
| <i>CLEC16A</i> | exon 3, sSNP    | ss119336650 | C | a | 77  | 46,226 | 0.2 | 2 / 960  | 23  | 42,674 | 0.1 | 1 / 960  | 1.00  |
| <i>CLEC16A</i> | exon 10, E424K  | ss119336659 | G | a | 62  | 40,283 | 0.2 | 1 / 960  | 2   | 42,074 | 0.0 | 0 / 960  | 1.00  |
| <i>CLEC16A</i> | intron 23       | ss107794726 | C | a | 41  | 33,845 | 0.1 | 1 / 960  | 122 | 25,129 | 0.5 | 5 / 960  | 0.22  |
| <i>CLEC16A</i> | exon 22, sSNP   | ss107794722 | G | a | 54  | 47,310 | 0.1 | 1 / 960  | 49  | 39,196 | 0.1 | 1 / 960  | 1.00  |
| <i>CLEC16A</i> | exon 24, sSNP   | ss107794729 | G | a | 51  | 45,887 | 0.1 | 1 / 960  | 95  | 32,143 | 0.3 | 3 / 960  | 0.62  |
| <i>CLEC16A</i> | exon 5, A179V   | ss107794720 | C | t | 43  | 39,135 | 0.1 | 1 / 960  | 42  | 38,202 | 0.1 | 1 / 960  | 1.00  |
| <i>CLEC16A</i> | intron 22       | ss119336672 | C | t | 42  | 28,170 | 0.1 | 1 / 960  | 8   | 21,715 | 0.0 | 0 / 960  | 1.00  |
| <i>CLEC16A</i> | exon 24, V983M  | ss119336674 | G | a | 47  | 33,828 | 0.1 | 1 / 960  | 2   | 25,133 | 0.0 | 0 / 960  | 1.00  |
| <i>CLEC16A</i> | intron 22       | ss119336673 | A | g | 30  | 28,430 | 0.1 | 1 / 960  | 0   | 21,747 | 0.0 | 0 / 960  | 1.00  |

|                |                 |             |   |   |     |        |     |          |     |        |     |          |      |
|----------------|-----------------|-------------|---|---|-----|--------|-----|----------|-----|--------|-----|----------|------|
| <i>CLEC16A</i> | intron 7        | ss119336652 | C | t | 45  | 46,388 | 0.1 | 1 / 960  | 9   | 40,432 | 0.0 | 0 / 960  | 1.00 |
| <i>CLEC16A</i> | exon 24, A1041T | ss119336677 | G | a | 44  | 45,889 | 0.1 | 1 / 960  | 4   | 32,160 | 0.0 | 0 / 960  | 1.00 |
| <i>CLEC16A</i> | exon 24, sSNP   | ss119336676 | C | t | 40  | 45,672 | 0.1 | 1 / 960  | 5   | 32,143 | 0.0 | 0 / 960  | 1.00 |
| <i>CLEC16A</i> | intron 8        | ss119336654 | G | a | 29  | 36,218 | 0.1 | 1 / 960  | 71  | 32,401 | 0.2 | 2 / 960  | 1.00 |
| <i>CLEC16A</i> | exon 10, sSNP   | ss119336658 | C | g | 31  | 40,149 | 0.1 | 1 / 960  | 0   | 42,071 | 0.0 | 0 / 960  | 1.00 |
| <i>CLEC16A</i> | exon 24, A986G  | ss119336675 | C | g | 26  | 33,773 | 0.1 | 1 / 960  | 0   | 25,131 | 0.0 | 0 / 960  | 1.00 |
| <i>CLEC16A</i> | exon 8, R314W   | ss119336653 | C | t | 27  | 39,783 | 0.1 | 1 / 960  | 10  | 32,417 | 0.0 | 0 / 960  | 1.00 |
| <i>CLEC16A</i> | exon 10, R383Q  | ss119336657 | G | a | 26  | 40,240 | 0.1 | 1 / 960  | 13  | 42,077 | 0.0 | 0 / 960  | 1.00 |
| <i>CLEC16A</i> | exon 15, H607N  | ss119336665 | C | a | 40  | 71,134 | 0.1 | 1 / 960  | 1   | 66,488 | 0.0 | 0 / 960  | 1.00 |
| <i>CLEC16A</i> | exon 20, A813T  | ss119336669 | G | a | 15  | 42,764 | 0.0 | 0 / 960  | 33  | 34,674 | 0.1 | 1 / 960  | 1.00 |
| <i>CLEC16A</i> | exon 22, V893M  | ss119336670 | G | a | 11  | 47,179 | 0.0 | 0 / 960  | 43  | 39,188 | 0.1 | 1 / 960  | 1.00 |
| <i>CLEC16A</i> | exon 15, sSNP   | ss119336664 | G | a | 7   | 70,611 | 0.0 | 0 / 960  | 85  | 66,484 | 0.1 | 1 / 960  | 1.00 |
| <i>CLEC16A</i> | exon 17, sSNP   | ss119336667 | G | a | 2   | 20,703 | 0.0 | 0 / 960  | 23  | 17,755 | 0.1 | 1 / 960  | 1.00 |
| <i>CLEC16A</i> | exon 2, sSNP    | ss119336649 | C | t | 4   | 47,760 | 0.0 | 0 / 960  | 40  | 45,903 | 0.1 | 1 / 960  | 1.00 |
| <i>CLEC16A</i> | exon 11, T484M  | ss119336660 | C | t | 3   | 40,382 | 0.0 | 0 / 960  | 86  | 32,891 | 0.3 | 3 / 960  | 0.25 |
| <i>CLEC16A</i> | intron 14       | ss119336662 | C | t | 3   | 67,334 | 0.0 | 0 / 960  | 79  | 66,482 | 0.1 | 1 / 960  | 1.00 |
| <i>CLEC16A</i> | intron 9        | ss119336656 | G | c | 1   | 35,604 | 0.0 | 0 / 960  | 52  | 38,194 | 0.1 | 1 / 960  | 1.00 |
| <i>CLEC16A</i> | exon 24, sSNP   | ss119336678 | C | t | 1   | 45,808 | 0.0 | 0 / 960  | 23  | 32,134 | 0.1 | 1 / 960  | 1.00 |
| <i>CLEC16A</i> | intron 14       | ss119336663 | A | g | 1   | 67,478 | 0.0 | 0 / 960  | 44  | 66,466 | 0.1 | 1 / 960  | 1.00 |
| <i>CLEC16A</i> | intron 15       | ss119336666 | T | g | 0   | 37,993 | 0.0 | 0 / 960  | 81  | 38,979 | 0.2 | 2 / 960  | 0.50 |
| <i>CLEC16A</i> | exon 4, H168R   | ss119336651 | A | g | 0   | 24,105 | 0.0 | 0 / 960  | 36  | 26,862 | 0.1 | 1 / 960  | 1.00 |
| <i>CLEC16A</i> | exon 9, Y355H   | ss119336655 | T | c | 0   | 35,923 | 0.0 | 0 / 960  | 31  | 38,183 | 0.1 | 1 / 960  | 1.00 |
| <i>CLEC16A</i> | exon 22, P937R  | ss119336671 | C | g | 0   | 47,010 | 0.0 | 0 / 960  | 22  | 39,208 | 0.1 | 1 / 960  | 1.00 |
| <i>FOXP3</i>   | exon 6, sSNP    | rs2232367   | C | t | 866 | 27,194 | 3.2 | 31 / 960 | 551 | 20,086 | 2.7 | 26 / 960 | 0.59 |
| <i>FOXP3</i>   | intron 10       | ss107794731 | G | a | 86  | 48,070 | 0.2 | 2 / 960  | 145 | 40,773 | 0.4 | 3 / 960  | 1.00 |

|               |                |             |   |   |      |        |     |          |      |        |     |          |      |
|---------------|----------------|-------------|---|---|------|--------|-----|----------|------|--------|-----|----------|------|
| <i>FOXP3</i>  | exon 12, R397W | rs28935477  | C | t | 42   | 26,035 | 0.2 | 2 / 960  | 30   | 16,416 | 0.2 | 2 / 960  | 1.00 |
| <i>FOXP3</i>  | intron 10      | ss119336609 | G | a | 70   | 48,282 | 0.1 | 1 / 960  | 46   | 40,789 | 0.1 | 1 / 960  | 1.00 |
| <i>FOXP3</i>  | intron 6       | ss119336607 | G | a | 31   | 27,349 | 0.1 | 1 / 960  | 1    | 20,098 | 0.0 | 0 / 960  | 1.00 |
| <i>FOXP3</i>  | intron 10      | ss119336610 | C | g | 35   | 33,853 | 0.1 | 1 / 960  | 1    | 29,747 | 0.0 | 0 / 960  | 1.00 |
| <i>FOXP3</i>  | exon 9, V292I  | ss119336608 | G | a | 1    | 31,600 | 0.0 | 0 / 960  | 73   | 20,794 | 0.4 | 3 / 960  | 0.25 |
| <i>IAN4L1</i> | exon 3, sSNP   | ss107794735 | G | a | 221  | 9,049  | 2.4 | 23 / 960 | 202  | 7,092  | 2.8 | 27 / 960 | 0.67 |
| <i>IAN4L1</i> | exon 3, I148V  | ss107794733 | A | g | 141  | 50,098 | 0.3 | 3 / 960  | 180  | 48,334 | 0.4 | 4 / 960  | 1.00 |
| <i>IAN4L1</i> | exon 3, L204P  | ss107794734 | T | c | 21   | 15,645 | 0.1 | 1 / 960  | 36   | 13,669 | 0.3 | 3 / 960  | 0.62 |
| <i>IAN4L1</i> | intron 2       | ss119336612 | C | t | 61   | 54,848 | 0.1 | 1 / 960  | 4    | 58,345 | 0.0 | 0 / 960  | 1.00 |
| <i>IAN4L1</i> | intron 2       | ss119336611 | C | t | 52   | 54,984 | 0.1 | 1 / 960  | 5    | 58,328 | 0.0 | 0 / 960  | 1.00 |
| <i>IAN4L1</i> | exon 3, sSNP   | ss119336614 | C | a | 1    | 20,915 | 0.0 | 0 / 960  | 20   | 19,314 | 0.1 | 1 / 960  | 1.00 |
| <i>IAN4L1</i> | exon 3, F87L   | ss119336613 | T | g | 0    | 33,252 | 0.0 | 0 / 960  | 30   | 29,142 | 0.1 | 1 / 960  | 1.00 |
| <i>IL2RA</i>  | exon 2, sSNP   | rs2228150   | G | a | 1160 | 47,841 | 2.4 | 23 / 960 | 1308 | 45,384 | 2.9 | 28 / 960 | 0.57 |
| <i>IL2RA</i>  | exon 4, sSNP   | rs2228149   | C | t | 1331 | 56,771 | 2.3 | 23 / 960 | 1301 | 50,188 | 2.6 | 25 / 960 | 0.88 |
| <i>IL2RA</i>  | intron 4       | rs11256360  | C | t | 1191 | 54,781 | 2.2 | 21 / 960 | 1322 | 49,959 | 2.6 | 25 / 960 | 0.65 |
| <i>IL2RA</i>  | intron 3       | rs942200    | G | a | 778  | 39,232 | 2.0 | 19 / 960 | 983  | 36,239 | 2.7 | 26 / 960 | 0.37 |
| <i>IL2RA</i>  | 5'UTR          | ss107794686 | G | t | 77   | 22,356 | 0.3 | 3 / 960  | 0    | 19,584 | 0.0 | 0 / 960  | 0.25 |
| <i>IL2RA</i>  | intron 7       | ss107794695 | A | g | 47   | 19,338 | 0.2 | 2 / 960  | 50   | 17,365 | 0.3 | 3 / 960  | 1.00 |
| <i>IL2RA</i>  | intron 6       | ss119336644 | C | g | 83   | 45,462 | 0.2 | 2 / 960  | 0    | 39,793 | 0.0 | 0 / 960  | 0.50 |
| <i>IL2RA</i>  | exon 3, T91M   | ss107794693 | C | t | 93   | 54,034 | 0.2 | 2 / 960  | 81   | 49,553 | 0.2 | 2 / 960  | 1.00 |
| <i>IL2RA</i>  | exon 3, S111N  | rs56054476  | G | a | 72   | 54,096 | 0.1 | 1 / 960  | 63   | 49,549 | 0.1 | 1 / 960  | 1.00 |
| <i>IL2RA</i>  | exon 2, sSNP   | ss119336637 | C | t | 62   | 51,073 | 0.1 | 1 / 960  | 2    | 45,663 | 0.0 | 0 / 960  | 1.00 |
| <i>IL2RA</i>  | intron 5       | ss119336643 | T | a | 48   | 59,712 | 0.1 | 1 / 960  | 65   | 62,716 | 0.1 | 1 / 960  | 1.00 |
| <i>IL2RA</i>  | exon 7, sSNP   | ss119336646 | G | a | 37   | 46,820 | 0.1 | 1 / 960  | 5    | 39,797 | 0.0 | 0 / 960  | 1.00 |
| <i>IL2RA</i>  | intron 2       | ss119336639 | A | t | 35   | 50,885 | 0.1 | 1 / 960  | 0    | 45,656 | 0.0 | 0 / 960  | 1.00 |



|               |                 |             |   |   |     |        |     |          |     |        |     |          |      |
|---------------|-----------------|-------------|---|---|-----|--------|-----|----------|-----|--------|-----|----------|------|
| <i>IL2RA</i>  | intron 7        | ss119336647 | G | a | 4   | 19,241 | 0.0 | 0 / 960  | 26  | 17,499 | 0.1 | 1 / 960  | 1.00 |
| <i>IL2RA</i>  | intron 4        | ss119336642 | C | t | 5   | 55,777 | 0.0 | 0 / 960  | 45  | 50,115 | 0.1 | 1 / 960  | 1.00 |
| <i>IL2RA</i>  | exon 1, M15I    | ss119336636 | G | a | 2   | 23,259 | 0.0 | 0 / 960  | 22  | 19,587 | 0.1 | 1 / 960  | 1.00 |
| <i>IL2RA</i>  | intron 2        | ss119336638 | G | a | 3   | 51,141 | 0.0 | 0 / 960  | 133 | 45,650 | 0.3 | 3 / 960  | 0.25 |
| <i>IL2RA</i>  | intron 6        | ss119336645 | C | t | 2   | 46,979 | 0.0 | 0 / 960  | 30  | 39,799 | 0.1 | 1 / 960  | 1.00 |
| <i>IL2RA</i>  | exon 3, V116A   | ss119336641 | T | c | 2   | 53,732 | 0.0 | 0 / 960  | 67  | 49,543 | 0.1 | 1 / 960  | 1.00 |
| <i>IL2RA</i>  | 5'UTR           | ss119336635 | C | g | 0   | 22,513 | 0.0 | 0 / 960  | 30  | 19,589 | 0.2 | 1 / 960  | 1.00 |
| <i>KCNJ11</i> | exon , sSNP     | rs8175351   | G | a | 156 | 8,671  | 1.8 | 17 / 960 | 116 | 5,137  | 2.3 | 22 / 960 | 0.52 |
| <i>KCNJ11</i> | exon , sSNP     | rs5216      | C | g | 354 | 20,199 | 1.8 | 17 / 960 | 236 | 15,950 | 1.5 | 14 / 960 | 0.72 |
| <i>KCNJ11</i> | exon , S385C    | rs41282930  | C | g | 29  | 8,663  | 0.3 | 3 / 960  | 33  | 5,138  | 0.6 | 6 / 960  | 0.51 |
| <i>KCNJ11</i> | exon 1, sSNP    | ss119336648 | C | t | 23  | 17,326 | 0.1 | 1 / 960  | 3   | 16,339 | 0.0 | 0 / 960  | 1.00 |
| <i>PTPN2</i>  | intron 3        | ss107794699 | T | c | 37  | 32,684 | 0.1 | 1 / 960  | 140 | 32,191 | 0.4 | 4 / 960  | 0.37 |
| <i>PTPN2</i>  | exon 9, G401C   | ss119336682 | G | t | 25  | 29,897 | 0.1 | 1 / 960  | 0   | 24,537 | 0.0 | 0 / 960  | 1.00 |
| <i>PTPN2</i>  | intron 4        | ss119336680 | G | a | 22  | 31,994 | 0.1 | 1 / 960  | 1   | 27,793 | 0.0 | 0 / 960  | 1.00 |
| <i>PTPN2</i>  | exon 3, S82G    | ss119336684 | A | g | 23  | 34,228 | 0.1 | 1 / 960  | 31  | 32,199 | 0.1 | 1 / 960  | 1.00 |
| <i>PTPN2</i>  | 3'UTR           | ss119336683 | T | c | 1   | 41,335 | 0.0 | 0 / 960  | 39  | 37,203 | 0.1 | 1 / 960  | 1.00 |
| <i>PTPN2</i>  | exon 5, sSNP    | ss119336681 | A | g | 0   | 21,836 | 0.0 | 0 / 960  | 24  | 22,016 | 0.1 | 1 / 960  | 1.00 |
| <i>PTPN2</i>  | exon 2, sSNP    | ss119336679 | T | c | 0   | 40,076 | 0.0 | 0 / 960  | 42  | 42,187 | 0.1 | 1 / 960  | 1.00 |
| <i>PTPN22</i> | exon 10, R263Q  | rs33996649  | G | a | 517 | 34,506 | 1.5 | 14 / 960 | 744 | 41,689 | 1.8 | 17 / 960 | 0.72 |
| <i>PTPN22</i> | intron 17       | rs34209542  | T | c | 270 | 19,001 | 1.4 | 14 / 960 | 610 | 31,218 | 2.0 | 19 / 960 | 0.48 |
| <i>PTPN22</i> | intron 20       | rs34639107  | T | a | 311 | 31,289 | 1.0 | 10 / 960 | 267 | 35,866 | 0.7 | 7 / 960  | 0.63 |
| <i>PTPN22</i> | exon 18, K750N, | ss107794704 | G | c | 96  | 23,006 | 0.4 | 4 / 960  | 55  | 30,137 | 0.2 | 2 / 960  | 0.69 |
| <i>PTPN22</i> | intron 2        | ss107794700 | A | g | 92  | 27,317 | 0.3 | 3 / 960  | 71  | 27,158 | 0.3 | 3 / 960  | 1.00 |
| <i>PTPN22</i> | exon 13, H370N  | ss107794702 | C | a | 79  | 35,655 | 0.2 | 2 / 960  | 91  | 34,995 | 0.3 | 2 / 960  | 1.00 |
| <i>PTPN22</i> | exon 18, R748G  | ss119336709 | A | g | 30  | 23,086 | 0.1 | 1 / 960  | 0   | 30,142 | 0.0 | 0 / 960  | 1.00 |

|               |                |             |   |   |    |        |     |         |     |        |     |         |      |
|---------------|----------------|-------------|---|---|----|--------|-----|---------|-----|--------|-----|---------|------|
| <i>PTPN22</i> | exon 14, P622R | ss119336706 | C | g | 39 | 30,416 | 0.1 | 1 / 960 | 0   | 30,023 | 0.0 | 0 / 960 | 1.00 |
| <i>PTPN22</i> | exon 10, R266W | ss107794701 | C | t | 37 | 34,122 | 0.1 | 1 / 960 | 77  | 41,656 | 0.2 | 2 / 960 | 1.00 |
| <i>PTPN22</i> | intron 2       | ss119336687 | G | c | 28 | 27,321 | 0.1 | 1 / 960 | 0   | 27,175 | 0.0 | 0 / 960 | 1.00 |
| <i>PTPN22</i> | intron 12      | ss119336699 | T | a | 44 | 43,851 | 0.1 | 1 / 960 | 0   | 46,481 | 0.0 | 0 / 960 | 1.00 |
| <i>PTPN22</i> | exon 13, sSNP  | ss119336704 | C | t | 34 | 34,025 | 0.1 | 1 / 960 | 1   | 37,000 | 0.0 | 0 / 960 | 1.00 |
| <i>PTPN22</i> | exon 13, Q456E | ss107794703 | C | g | 46 | 46,035 | 0.1 | 1 / 960 | 113 | 39,778 | 0.3 | 3 / 960 | 0.62 |
| <i>PTPN22</i> | exon 8, S201F  | ss119336693 | C | t | 33 | 38,841 | 0.1 | 1 / 960 | 4   | 36,915 | 0.0 | 0 / 960 | 1.00 |
| <i>PTPN22</i> | exon 13, sSNP  | ss119336702 | T | c | 37 | 44,688 | 0.1 | 1 / 960 | 52  | 39,805 | 0.1 | 1 / 960 | 1.00 |
| <i>PTPN22</i> | exon 18, sSNP  | ss119336708 | A | g | 18 | 23,298 | 0.1 | 1 / 960 | 0   | 30,137 | 0.0 | 0 / 960 | 1.00 |
| <i>PTPN22</i> | exon 1, sSNP   | ss119336685 | C | t | 26 | 36,361 | 0.1 | 1 / 960 | 1   | 29,375 | 0.0 | 0 / 960 | 1.00 |
| <i>PTPN22</i> | intron 9       | ss119336695 | C | t | 25 | 37,403 | 0.1 | 1 / 960 | 1   | 33,773 | 0.0 | 0 / 960 | 1.00 |
| <i>PTPN22</i> | exon 3, V71A   | ss119336688 | T | c | 18 | 27,266 | 0.1 | 1 / 960 | 1   | 27,176 | 0.0 | 0 / 960 | 1.00 |
| <i>PTPN22</i> | exon 13, S576C | ss119336705 | C | g | 21 | 34,054 | 0.1 | 1 / 960 | 0   | 37,011 | 0.0 | 0 / 960 | 1.00 |
| <i>PTPN22</i> | intron 2       | ss119336686 | T | c | 16 | 27,321 | 0.1 | 1 / 960 | 1   | 27,154 | 0.0 | 0 / 960 | 1.00 |
| <i>PTPN22</i> | intron 5       | ss119336690 | A | g | 9  | 21,938 | 0.0 | 0 / 960 | 45  | 23,580 | 0.2 | 2 / 960 | 0.50 |
| <i>PTPN22</i> | intron 6       | ss119336691 | G | a | 4  | 26,361 | 0.0 | 0 / 960 | 35  | 23,731 | 0.1 | 1 / 960 | 1.00 |
| <i>PTPN22</i> | exon 15, I650M | ss119336707 | T | g | 2  | 42,936 | 0.0 | 0 / 960 | 47  | 49,106 | 0.1 | 1 / 960 | 1.00 |
| <i>PTPN22</i> | intron 12      | ss119336698 | G | c | 2  | 44,389 | 0.0 | 0 / 960 | 38  | 46,476 | 0.1 | 1 / 960 | 1.00 |
| <i>PTPN22</i> | intron 8       | ss119336694 | A | g | 1  | 37,931 | 0.0 | 0 / 960 | 41  | 36,916 | 0.1 | 1 / 960 | 1.00 |
| <i>PTPN22</i> | exon 13, sSNP  | ss119336700 | G | a | 1  | 43,200 | 0.0 | 0 / 960 | 45  | 41,549 | 0.1 | 1 / 960 | 1.00 |
| <i>PTPN22</i> | exon 13, Y528C | ss119336703 | A | g | 0  | 41,180 | 0.0 | 0 / 960 | 86  | 39,031 | 0.2 | 2 / 960 | 0.50 |
| <i>PTPN22</i> | intron 10      | ss119336696 | T | g | 0  | 34,345 | 0.0 | 0 / 960 | 72  | 41,669 | 0.2 | 2 / 960 | 0.50 |
| <i>PTPN22</i> | intron 3       | ss119336689 | A | c | 0  | 30,596 | 0.0 | 0 / 960 | 38  | 38,660 | 0.1 | 1 / 960 | 1.00 |
| <i>PTPN22</i> | intron 10      | ss119336697 | G | c | 0  | 34,324 | 0.0 | 0 / 960 | 39  | 41,662 | 0.1 | 1 / 960 | 1.00 |
| <i>PTPN22</i> | intron 7       | ss119336692 | T | g | 0  | 36,547 | 0.0 | 0 / 960 | 32  | 37,816 | 0.1 | 1 / 960 | 1.00 |

|               |                |             |   |   |    |        |     |         |    |        |     |         |      |
|---------------|----------------|-------------|---|---|----|--------|-----|---------|----|--------|-----|---------|------|
| <i>PTPN22</i> | exon 13, I444L | ss119336701 | A | t | 0  | 45,881 | 0.0 | 0 / 960 | 21 | 39,801 | 0.1 | 1 / 960 | 1.00 |
| <i>SH2B3</i>  | exon 6, E400K  | ss107794706 | G | a | 91 | 22,702 | 0.4 | 4 / 960 | 12 | 20,262 | 0.1 | 1 / 960 | 0.37 |
| <i>SH2B3</i>  | exon 8, N537D  | ss119336716 | A | g | 34 | 23,588 | 0.1 | 1 / 960 | 0  | 16,442 | 0.0 | 0 / 960 | 1.00 |
| <i>SH2B3</i>  | exon 8, L476F  | ss119336715 | C | t | 32 | 25,029 | 0.1 | 1 / 960 | 4  | 19,587 | 0.0 | 0 / 960 | 1.00 |
| <i>SH2B3</i>  | intron 5       | ss119336711 | T | c | 31 | 35,146 | 0.1 | 1 / 960 | 34 | 30,675 | 0.1 | 1 / 960 | 1.00 |
| <i>SH2B3</i>  | exon 8, R566W  | ss107794689 | C | t | 9  | 23,704 | 0.0 | 0 / 960 | 51 | 16,433 | 0.3 | 3 / 960 | 0.25 |
| <i>SH2B3</i>  | exon 7, sSNP   | ss119336714 | C | t | 8  | 33,433 | 0.0 | 0 / 960 | 29 | 25,318 | 0.1 | 1 / 960 | 1.00 |
| <i>SH2B3</i>  | intron 5       | ss119336712 | C | t | 4  | 33,908 | 0.0 | 0 / 960 | 36 | 30,673 | 0.1 | 1 / 960 | 1.00 |
| <i>SH2B3</i>  | exon 7, A453T  | ss119336713 | G | a | 3  | 33,446 | 0.0 | 0 / 960 | 24 | 25,314 | 0.1 | 1 / 960 | 1.00 |
| <i>SH2B3</i>  | exon 5, sSNP   | ss119336710 | C | t | 3  | 36,726 | 0.0 | 0 / 960 | 24 | 30,659 | 0.1 | 1 / 960 | 1.00 |

Table S4. Association analysis of the two rare intronic *CLEC16A* SNPs in T1D patients and controls from Great Britain

| SNP         | Allele <sup>a</sup> |          | Case – control study |      |     |     |    |      |       |                          |                              |
|-------------|---------------------|----------|----------------------|------|-----|-----|----|------|-------|--------------------------|------------------------------|
|             | 1>2                 |          | 11                   | (%)  | 12  | (%) | 22 | (%)  | MAF,% | OR (95% CI) <sup>b</sup> | <i>P</i> -value <sup>c</sup> |
| ss107794687 | C>T                 | T1D      | 6,291                | 95.7 | 279 | 4.2 | 6  | 0.09 | 2.2   | 1.01                     | 0.89                         |
| Intron 11   |                     | Controls | 6,299                | 95.7 | 280 | 4.3 | 4  | 0.06 | 2.2   | (0.86-1.19)              |                              |
| ss107794688 | C>T                 | T1D      | 7,248                | 96.6 | 253 | 3.4 | 2  | 0.03 | 1.7   | 0.88                     | 0.13                         |
| Intron 23   |                     | Controls | 7,034                | 96.2 | 273 | 3.7 | 6  | 0.08 | 2.0   | (0.74-1.04)              |                              |

a – Major allele is coded 1, minor allele is coded 2

b – Odds ratios (OR) for minor (rarer) alleles are shown

c – two-tailed *P*-value were calculated using logistic regression

Table S5. Association analysis of the *IFIH1* polymorphisms in T1D patients and controls and in families comprising one or more offspring with T1D and their parents

|                             | Allele <sup>a</sup> |          | Case – control study |              |              |       |                          | Family study            |        | Combined                 |                        |                         |
|-----------------------------|---------------------|----------|----------------------|--------------|--------------|-------|--------------------------|-------------------------|--------|--------------------------|------------------------|-------------------------|
|                             | 1>2                 |          | 11 (%)               | 12 (%)       | 22 (%)       | MAF,% | OR (95% CI) <sup>b</sup> | P-value <sup>c</sup>    | T/NT   | RR (95% CI) <sup>b</sup> | P-value <sup>d</sup>   | P-value <sup>e</sup>    |
| <b>Rare polymorphisms</b>   |                     |          |                      |              |              |       |                          |                         |        |                          |                        |                         |
| rs35667974/Ile923Val        | A>G                 | T1D      | 7,853 (97.8)         | 172 (2.1)    | 3 (0.04)     | 1.1   | 0.51                     | 1.3 x 10 <sup>-14</sup> | 67/    | 0.60                     | 5.9 x 10 <sup>-4</sup> | 2.1 x 10 <sup>-16</sup> |
| Exon 14                     |                     | Controls | 9,166 (95.7)         | 404 (4.2)    | 4 (0.04)     | 2.2   | (0.43-0.61)              |                         | 111    | (0.45-0.82)              |                        |                         |
| rs35337543/IVS8+1           | G>C                 | T1D      | 7,945 (98.0)         | 163 (2.0)    | 0 (0.0)      | 1.0   | 0.68                     | 1.1 x 10 <sup>-4</sup>  | 51/    | 0.85                     | 0.20                   | 1.4 x 10 <sup>-4</sup>  |
| Intron 8, splice site       |                     | Controls | 9,330 (97.1)         | 280 (2.9)    | 0 (0.0)      | 1.5   | (0.56-0.83)              |                         | 60     | (0.59-1.23)              |                        |                         |
| rs35744605/Glu627X          | G>T                 | T1D      | 8,109 (99.1)         | 76 (0.9)     | 0 (0.0)      | 0.46  | 0.69                     | 9.0 x 10 <sup>-3</sup>  | 17/    | 0.55                     | 2.8 x 10 <sup>-2</sup> | 1.3 x 10 <sup>-3</sup>  |
| Exon10                      |                     | Controls | 9,621 (98.7)         | 131 (1.3)    | 0 (0.0)      | 0.67  | (0.52-0.91)              |                         | 31     | (0.30-0.99)              |                        |                         |
| rs35732034/IVS14+1          | G>A                 | T1D      | 8,047 (98.6)         | 109 (1.3)    | 2 (0.03)     | 0.69  | 0.74                     | 1.2 x 10 <sup>-2</sup>  | 35/    | 0.63                     | 2.1 x 10 <sup>-2</sup> | 1.1 x 10 <sup>-3</sup>  |
| Intron 14, splice site      |                     | Controls | 9,552 (98.1)         | 180 (1.9)    | 1 (0.01)     | 0.93  | (0.59-0.94)              |                         | 56     | (0.41-0.95)              |                        |                         |
| ss107794690/Thr702Ile       | C>T                 | T1D      | 8,064 (99.4)         | 46 (0.6)     | 1 (0.01)     | 0.30  | 0.89                     | 0.52                    | not    | tested                   |                        |                         |
| Exon 11                     |                     | Controls | 9,655 (99.3)         | 65 (0.7)     | 0 (0.0)      | 0.33  | (0.61-1.28)              |                         |        |                          |                        |                         |
| ss107794691/Lys349Arg       | A>G                 | T1D      | 8,081 (99.5)         | 42 (0.5)     | 0 (0.0)      | 0.26  | 1.23                     | 0.35                    | not    | tested                   |                        |                         |
| Exon 5                      |                     | Controls | 9,674 (99.6)         | 41 (0.4)     | 0 (0.0)      | 0.21  | (0.80-1.89)              |                         |        |                          |                        |                         |
| rs10930046/His460Arg        | A>G                 | T1D      | 8,159 (97.6)         | 195 (2.3)    | 2 (0.02)     | 1.2   | 1.20                     | 0.062                   | not    | tested                   |                        |                         |
| Exon 7                      |                     | Controls | 10,302 (98.0)        | 206 (2.0)    | 1 (0.01)     | 1.0   | (0.99-1.46)              |                         |        |                          |                        |                         |
| <b>Common polymorphisms</b> |                     |          |                      |              |              |       |                          |                         |        |                          |                        |                         |
| rs3747517/Arg843His         | G>A                 | T1D      | 4,720 (56.3)         | 3,120 (37.2) | 539 (6.4)    | 25.1  | 0.87                     | 7.1 x 10 <sup>-10</sup> | not    | tested                   |                        |                         |
| Exon 13                     |                     | Controls | 5,519 (52.2)         | 4,216 (39.9) | 840 (7.9)    | 27.9  | (0.83-0.91)              |                         |        |                          |                        |                         |
| rs1990760/Thr946Ala         | A>G                 | T1D      | 3,280 (42.3)         | 3,502 (45.1) | 977 (12.6)   | 35.2  | 0.86                     | 2.3 x 10 <sup>-14</sup> | 1,219/ | 0.87                     | 2.6 x 10 <sup>-4</sup> | 9.5 x 10 <sup>-17</sup> |
| Exon 15                     |                     | Controls | 3,789 (37.2)         | 4,813 (47.3) | 1,573 (15.5) | 39.1  | (0.81-0.88)              |                         | 1,395  | (0.81-0.94)              |                        |                         |

a – Major allele is coded 1, minor allele is coded 2

b – Odds ratios (OR) and relative risks (RR) for minor (rarer) alleles are shown

c – two-tailed *P*-values were calculated using logistic regression

d – one-tailed  $P$ -values were calculated using transmission disequilibrium test with robust variance estimates

e – combined  $P$ -values for the case-control and family data were calculated using a score test as described previously (26)

95% CI – 95% confidence interval, MAF – minor allele frequency, T/NT- number of alleles transmitted and non-transmitted to the affected offspring

Table S6. Testing independence of T1D association of the four rare *IFIH1* variants and the common rs1990760/Thr946Ala SNP

Logistic regression analyses in the case-control dataset and conditional logistic regression analyses in the affected families were done to test whether T1D association of the four rare *IFIH1* variants is independent of the common rs1990760/Thr946Ala SNP. Note that adding each of the four rare variants significantly improves the model of T1D association for the rs1990760/Thr946Ala polymorphism in all tests, apart from the rs35337543/IVS8+1 in the families. The most likely reason for no effect of rs35337543/IVS8+1 in the families is lack of statistical power: for example, this variant was not polymorphic in 1,129 Finnish families that substantially contributed to our family dataset.

| SNP                  | Frequency (UK), % | <i>P</i> (case-control) | <i>P</i> (families) |
|----------------------|-------------------|-------------------------|---------------------|
| rs35667974/Ile923Val | 2.2               | 4.1 x 10 <sup>-9</sup>  | 0.0063              |
| rs35337543/IVS8+1    | 1.5               | 0.00019                 | 0.82                |
| rs35744605/Glu627X   | 0.67              | 0.0031                  | 0.0068              |
| rs35732034/IVS14+1   | 0.93              | 0.0072                  | 0.0090              |
| rs1990760/Thr946Ala  | 39.1              | -                       | -                   |

***References for the Supporting Online material***

- S1. D. Smyth *et al.*, *Diabetes* **53**, 3020 (2004).
- S2. H. J. Cordell, D. G. Clayton, *Am J Hum Genet* **70**, 124 (2002).
- S3. R. S. Spielman, R. E. McGinnis, W. J. Ewens, *Am J Hum Genet* **52**, 506 (1993).
- S4. J. C. Barrett, B. Fry, J. Maller, M. J. Daly, *Bioinformatics* **21**, 263 (2005).
